# Supplementary material for: Historical patterns of rice farming explain modern-day language use in China and Japan more than modernization and urbanization
Source: Springer Nature journal article supplement (doi:10.1057/s41599-024-04053-7), 2024-12-24
Supplement: MOESM1 [file 41599_2024_4053_MOESM1_ESM.pdf]

**Supplemental Materials for  
Historical patterns of rice farming explain modern-day language use in China and  
Japan more than modernization and urbanization**

Sharath Chandra Guntuku<sup>1,2\*</sup>, Thomas Talhelm<sup>3\*</sup>, Garrick Sherman<sup>1,2</sup>, Angel Fan<sup>2</sup>,  
Salvatore Giorgi<sup>1</sup>, Liuqing Wei<sup>4</sup>, Lyle H. Ungar<sup>1,2</sup>

<sup>1</sup>Department of Computer and Information Science, University of Pennsylvania, Philadelphia, PA, USA

<sup>2</sup>Positive Psychology Center, University of Pennsylvania, Philadelphia, PA, USA

<sup>3</sup>Booth School of Business, University of Chicago, Chicago, IL, USA

<sup>4</sup>Department of Psychology, Hubei University, Wuhan, Hubei, China

\*corresponding authors: [sharathg@upenn.edu](mailto:sharathg@upenn.edu), [Thomas.Talhelm@chicagobooth.edu](mailto:Thomas.Talhelm@chicagobooth.edu)

This document contains additional discussion on the materials and methods used in the main text and supplemental figures and tables.

## ***Materials and Methods***

### **1. Classifying Dialects**

To categorize provinces into dialect groups, we relied on the *Language Atlas of China* ([map](#); 中国语言地图集). For the Mandarin-only analysis, we classified provinces as Mandarin or non-Mandarin. For the "excluding Cantonese" analysis, we classified provinces as Cantonese or non-Cantonese.

As is probably the case for most large countries around the world, there are debates about what should count as distinct groups. Three provinces stick out as particularly open for debate:

- Shanxi is sometimes categorized as having its own Jin dialect and sometimes as Mandarin, as in the *Language Atlas of China*. We followed the classification of Shanxi as Mandarin.
- A geographically small part of southern Jiangsu is categorized as Wu dialect. However, because most of the province is Mandarin, we classified Jiangsu as Mandarin.
- The province of Anhui is more split than Jiangsu, with areas of Mandarin, Wu, Hui, and Gan. We classified Anhui as non-Mandarin to reflect this diversity.

### **2. Pathogen Prevalence**

We indexed pathogen prevalence based on statistics from the earliest data we could find. This study surveyed disease in 49 counties in 1976 (Chen et al. 1990). That study did not have data from a handful of provinces. To compensate for this limited data, we added statistics from the earliest statistical yearbooks we could find (from 2001 to 2008 depending on the province).

A total of 10 provinces had data from both sources. This allowed us to test how well the two sources agreed, especially considering that the statistics are separated by about 30 years. The two sources were meaningfully correlated, although it was not significant in such a small sample  $r(8) = 0.43$ ,  $P = 0.25$ . With these two data sources, we had pathogen data for 15 provinces in our sample. More details on these measures are in the supplemental materials of the earlier rice-wheat study in China (Talhelm et al. 2014).

### 3. Herding Cultures

Although we compare rice and wheat farming, China is also home to cultures that traditionally herded, such as Mongolians, Manchu, and Tibetans. It is important to test the effect of herding because there is evidence that herding cultures are more independent and analytic-thinking than nearby farming communities (Goldschmidt 1971; Uskul et al. 2008). In addition, herding cultures are more often located near China's wheat-farming areas, which means they are more likely to have been influenced by individualistic herding cultures. We tested this possibility by indexing the percentage of the provincial population from traditional herding cultures in the 2000 Census.

China's biggest historic herding groups were Tibetans, Uyghurs, Mongolians, Manchus, and Turkic groups like the Kyrgyz. We used the following list: Uyghur, Mongolians, Manchu, Tibetan, Kyrgyz, Salar, Daur, Xibo, Tajik, Uzbek, Ewenke, Yugur, Tatar, Elunchun, Hezhe, Menba, Luoba, and Kazakh. For many of these smaller cultural groups, it is difficult to accurately estimate the percentage that herding made up of their traditional subsistence. However, decisions to include or exclude many of the small groups makes little difference to the analyses, because the groups with sparse historical records have such small populations.

### 4. City Tier System

Although it is common in China to refer to prefectures as first tier, second tier, and third tier, there are different lists of exactly which prefectures fall into which categories. To avoid the bias inherent in choosing which cities fall into which categories, we relied on a publicly available list from Baidu Baike (similar to Wikipedia). The full list is available in the supplemental materials.

### 5. Rice Suitability

We measured rice suitability using the United Nations Food and Agriculture Organization's Global Agro-Ecological Zones database. We used values for high-input rainfed current cultivated wetland rice. These scores estimate the suitability for plots of land regardless of whether people are farming rice there or not. The models use climate data from 1961 to 1990.

It is worth keeping in mind that these models are not designed exactly for our purpose—estimating historical rice suitability. Were we to design these models, we would estimate historical climate data farther back in history. We would also calculate suitability using historical breeds of rice and pre-modern tools. Thus, we believe the United Nations' estimates are useful but likely overestimate the suitability of rice historically.

It's also important to remember that suitability changes over time—not just as the climate changes, but as new rice strains develop, and as humans create new methods of farming. Suitability is not completely fixed. However, we believe these estimates are useful in providing broad outlines of historical suitability.

The database provides summary scores for each province, so we used these values directly in the province analysis. However, the database does not aggregate the values for prefectures. Thus, we used two methods to estimate suitability at the prefecture level. First, for any province that the United Nations database aggregated suitability to a score of zero, we simply assigned zero to all prefectures in the province.

Second, for provinces with aggregate scores above zero, we estimated suitability using prefecture-level temperature and rain. Temperature and rainfall both strongly predict actual rice farming, but when put in the same model, rainfall ( $\beta = 0.74$ ,  $P < 0.001$ ) is a much stronger predictor than temperature ( $\beta = 0.11$ ,  $P = 0.030$ ). We compared simple models to models that used squared predictors, gated values, and interactions between temperature and

rainfall. However, these models produced highly similar results, so we chose the basic models for the sake of simplicity and to avoid over-fitting.

## 6. Newly Created Theory-Driven Categories

The LIWC dictionary was not built with the goal of measuring cultural differences in mind. Thus, there were categories that we were interested in but not reflected in LIWC. We generated four new categories based on prior theorizing. In this section, we lay out the theoretical basis for each category.

**In-group/out-group.** Some cultural psychologists have argued that collectivistic cultures do not so much prioritize the needs of groups, but rather draw a distinction between people in familiar groups (in-group) versus unfamiliar groups (out-groups) (Triandis 1995). In China, Shanghai and other southern rice-farming regions have a reputation as being *paiwai* (排外), excluding to outsiders. This fits with the finding that people from rice-growing provinces in China drew a larger distinction between friends and strangers than people from wheat-growing provinces (Talhelm et al. 2014; Dong et al. 2019).

We created two sub-categories of in-group/out-group words to take into account that some words carry a positive connotation, and some carry a negative connotation. For example, people usually use the word *comrade/brethren* (同胞) to emphasize connection and unity among people of different groups. In contrast, people usually use the term *outsider/out-of-towner* (外地人) to criticize or look down on people outside of the local group.

**Universalism.** Similar to in-group/out-group words, we created a category of universalism words. These words represent a focus on humans without regard to their group membership. This reflects the opposite of the in-group/out-group distinction that researchers have theorized is a part of collectivistic cultures (Triandis 1995).

**Fashion/trends.** We speculate that fashion and trends may be more important in collectivistic cultures. This would make sense with the idea that people in collectivistic cultures have more socially shared standards, whereas people in individualistic cultures are more likely to have individually defined standards (Dunning and Cohen 1992). If standards for beauty are more socially consensual in collectivistic cultures, it would be more important to stay on top of social trends. Based on this reasoning, we created a fashion/trends category including words like *hot* (to describe ideas and trends, 热门), *out-of-style* (过时), and *celebrities* (名流).

**Alone.** Previous studies have found that people in individualistic regions are more likely to spend time alone than people in collectivistic regions. For example, Americans in individualistic states are more likely to live alone or drive alone (Vandello and Cohen 1999). In China, people were more likely to be sitting alone in cafes in more individualistic wheat-farming areas than in collectivistic rice-farming areas (Talhelm et al. 2018). These words are a limited set of words that have a connotation of spending time alone, such as *individually* (单独), *be alone* (独处). It does not include words about *feeling* alone, like "lonely."

**Justice.** We created a word category related to justice, such as *fair* (公平), *equal* (平等), *public welfare* (公益). The theory behind this category is the research on cultural differences in moral visions. Research using moral dilemmas across cultures has found that Americans are more likely to focus on abstract justice, whereas participants in India were more likely to focus on relational duties (Miller and Bersoff 1992).

## 7. Wenxin Dictionary

We also ran analyses with the Wenxin dictionary (Huang et al. 2012), which is an expanded form of the LIWC Chinese dictionary. Because the results were largely similar to the results for LIWC, we report results from LIWC, which is more broadly used in research.

## **8. Alternative Measures of Modernization**

Some researchers have argued that GDP is not the best measure of modernization (Inglehart and Norris 2003). For example, some countries have become wealthy through mining or oil but have not really modernized their economies. Modernization theorist Ronald Inglehart has advocated for using the percentage of people employed in the service sector as a measure of modernization and the turn away from farming and heavy industry (Inglehart and Baker 2000). In China, the move from the government-led economy to the private sector may also reflect modernization. Thus, we tested recent (year 2010) and historical (1996) percentage of employed people working in the service sector and the percentage of people employed in private industry.

## **9. Urbanization**

We used the percentage of urban residents (城镇人口比例) in each province as an index of urbanization from the year 2016 to represent modern statistics and the year 2000 to represent time-lagged differences in recent history (Li 2017).

## **10. Pathogen Prevalence**

As a measure of historical pathogens, we used human-transmitted disease rates from a 1973-1975 study (Chen et al. 1990). Because this study was missing several provinces, we supplemented this data with disease rates from provincial statistical yearbooks from 2001 to 2008 for 14 provinces (we report more details on this method in an earlier study (Talhelm et al. 2014)).

## **11. Temperature**

Some researchers have argued that temperature might drive differences between cultures (although the exact reason why temperature would cause differences is often unclear (Kashima and Kashima 2003)). We collected data on the average temperature for the capital city of each province. In China, average temperature is highly correlated with rice  $r(31) = 0.73$ ,  $P < 0.001$ .

## **12. Climatic Demands**

One team of researchers argued that climatic demands can explain regional differences in China (Van de Vliert et al. 2012). This theory is that humans bind together and rely on each other in response to difficult climates. We followed prior research and operationalized climatic demands as the sum deviation from 22 degrees Celsius for the average highs and lows in the coldest (January) and hottest month (July). In the supplemental materials, we test an alternative version of climatic demands theory that takes into account wealth.

## **13. Herding Cultures**

Rice and wheat are just two types of subsistence styles. Studies comparing people in nearby farming and herding cultures have found evidence that herders tend to be more independent than farmers (Uskul et al. 2008). Areas of north and west China are home to cultures that traditionally herded, such as the Mongolians and Tibetans. As a measure of herding cultures, we calculated the percentage of the population in each province that belonged to 18 historically herding cultures from China's 2000 national census. Because this data was not normally distributed, we square root transformed the data.

## **14. Farming in General versus Rice Farming**

Previous studies on subsistence theory compared farming cultures to herding, hunting, and fishing cultures, finding that farming cultures tend to be more interdependent (Barry et al. 1959;

Uskul et al. 2008). Thus, we need to test whether what we are calling an effect of rice is not actually an effect of farming in general. As a measure of farming in general, we collected data on the percentage of cultivated land in each province. This is actually uncorrelated with rice farming  $r(31) = 0.04$ ,  $P = 0.823$ .

### 15. Cognitive Process Words

Are the cognitive process words related to analytic cultural thought style? As a first pass, we calculated average cognitive process word use scores for each province. Then we compared these province scores to our earlier study measuring analytic thought among college students across China (Talhelm et al. 2014). Provinces that used more cognitive process words scored marginally lower on holistic thought (or higher on analytic thought),  $r(27) = -0.33$ ,  $P = 0.083$ . Aggregating scores to the province level limits the sample to 29 provinces, and the correlation was only marginally significant. However, the direction is consistent with the idea that regional differences in the use of cognitive process words reflect, to some extent, differences in holistic versus analytic thought.

### 16. Rice Statistics in Japan

One limitation of the rice statistics from Japan is that they do not separate dryland versus paddy rice. Theoretically, paddy rice should make cultures more interdependent than dryland rice because dryland rice grows without irrigation systems (Talhelm and Oishi 2018). However, this may not present much of a problem in Japan because national statistics (which do separate paddy rice and dryland rice) show that dryland rice accounts for just 1.6% of rice land. Thus, the rice statistics overall overwhelmingly represent paddy rice.

In the main text, we ask the question of whether the data from 1975 represents historical patterns of rice farming. One way to test this is to use data from 10 larger regional blocks going back to 1950. Although there are fewer regional blocks than prefectures, the data showed very little variation from 1950 to 1975. Data from 1950 correlated highly with data from 1975,  $r(8) = 0.90$ ,  $P = 0.001$ . Even nearly 60 years later (using data from 2009), the correlation remained high,  $r(8) = 0.89$ ,  $P = 0.001$ . In sum, this data suggests that regional differences in rice percentage are highly stable over time. Data spanning roughly 100 years in China shows similar results (Talhelm et al. 2014).

To calculate the correlation between environmental suitability for rice and actual rice farming, we used data from the United Nations Food and Agriculture Organizations Global Agro-Ecological Zones database. This database estimates environmental suitability for different crops based on environmental variables like rain, sun, slope, and soil. We used data for high-input wetland rice. This calculates suitability scores for plots of land, regardless of whether people are actually farming rice there or not.

Examining the data, it was clear that large cities were farming less rice than predicted by their environmental suitability scores. This suggests that buildings are taking up land that would probably otherwise be growing rice (and probably grew rice historically). Thus, we ran a regression using environmental suitability scores and statistics on the percentage of land occupied by buildings per prefecture. Taking into account buildings, environmental suitability strongly predicted rice farming  $\beta = 0.78$ ,  $P < 0.001$ .

### 17. Japan Regional Statistics

To measure economic development, we collected 2012 prefecture GDP per capita from the Cabinet Office of Japan's *2013 Annual Report on Prefectural-Level Accounts (Heisei 25 nen Kenminn keizai keisan)*. To measure educational attainment, we collected 2010 data on the percentage of residents who had completed a college degree from a report of the Statistics Bureau of Japan (Table E).

## 18. R Squared for Rice vs. Modernization in Japan

With the China data, we compared the percentage of province-level variance explained (R squared) by rice, GDP, urbanization, and the combination of GDP and urbanization (as  $Z$  scores). We calculated prefecture-level variance explained for Japan. However, it is tricky to compare the results in China to the results in Japan. In China, there is wide variation in rice farming. Many prefectures farm zero rice. Japan has a narrower range of variation in rice. In Japan, every prefecture farms at least some rice. Statistically, Japanese prefectures have less than half (39%) the variance in rice compared to Chinese prefectures. Thus, holding all else equal, we would expect rice to explain less variance in Japan because there is less variance in rice.

An analogy would be in testing for the effect of height on people's ability to dunk a basketball. In one study, we test 100 American 20-year-olds and find a large effect of height. Then we test 100 NBA players and find a smaller effect of height, since height varies less between NBA players than for the population at large. Thus, our expectations for the effect size need to take into account how much variation the sample has in the key variable.

For rice, the variation in China is a better representation of the world at large than Japan is. The world has many areas that farm no rice and many areas that farm a high percentage of rice. In contrast, Japan is a less representative sample of rice farming percentages, similar to how NBA players are less representative of the height of humans than regular adults.

To make matters more complicated, Japanese prefectures have more variation in GDP. We compared variance by converting GDP per capita to US dollars. Based on this, Japanese prefectures had roughly double (219%) the variance of China. Thus, rice has lower variance in Japan and therefore is expected to account for less variance in word use. However, rice still accounts for more variance in word use than GDP and urbanization in Japan, although the gap between rice and modernization is smaller in Japan than in China.

Across all LIWC categories, the average percentage of variance explained was:

Rice: 2.9%  
GDP: 2.2%  
Urbanization: 1.9%  
GDP and urbanization: 2.2%

Across the hypothesized, the average percentage of variance explained was:

Rice: 3.7%  
GDP: 3.3%  
Urbanization: 2.7%  
GDP and urbanization: 3.4%

Overall, the percentage of variance explained by any variable was smaller in the Japanese data than the Chinese data. There are several possible explanations. (1) Prefectures are smaller units of analysis than provinces. Larger units of analysis tend to have larger effect sizes because the data is aggregated over larger areas. (2) We had more data from China than Japan, which means the estimates from China are more precise. (3) Finally, the data comes from different platforms. There could be some difference between Weibo and Twitter that might account for the differences.

## 19. Convergent Validity Tests for Word Categories

To test convergent validity, we calculated the mean word usage for each province and prefecture. We then calculated region-level correlations between word usage and other markers of collectivism and individualism. The notes below the tables list the data sources for the markers of individualism and collectivism. Table 2 shows the correlations for the word categories that were different between rice and wheat regions. Table S20 shows the correlations for the word categories that were not different between rice and wheat regions.

In general, the word categories that did not show rice-wheat differences tended to fail the tests of convergent validity. For example, collectivistic areas tended to use *less* “we” than individualistic areas. And although collectivistic areas also used less “I,” they used far less “we.” Similarly, collectivistic areas actually used fewer words related to fashion and trends.

To calculate the prefecture-level correlations, we took into account the sample size for different prefectures. The main analyses throughout this paper use multi-level analyses, which take into account the different sample sizes across prefectures. But these basic validity correlations treat each prefecture as an equal data point. Therefore, we limited the convergent validity analyses to prefectures with over 200 users. That left 50 prefectures.

*Figures and Tables*

**Figure S1**

*Rice-Wheat Differences Are Largely Independent of Dialect*

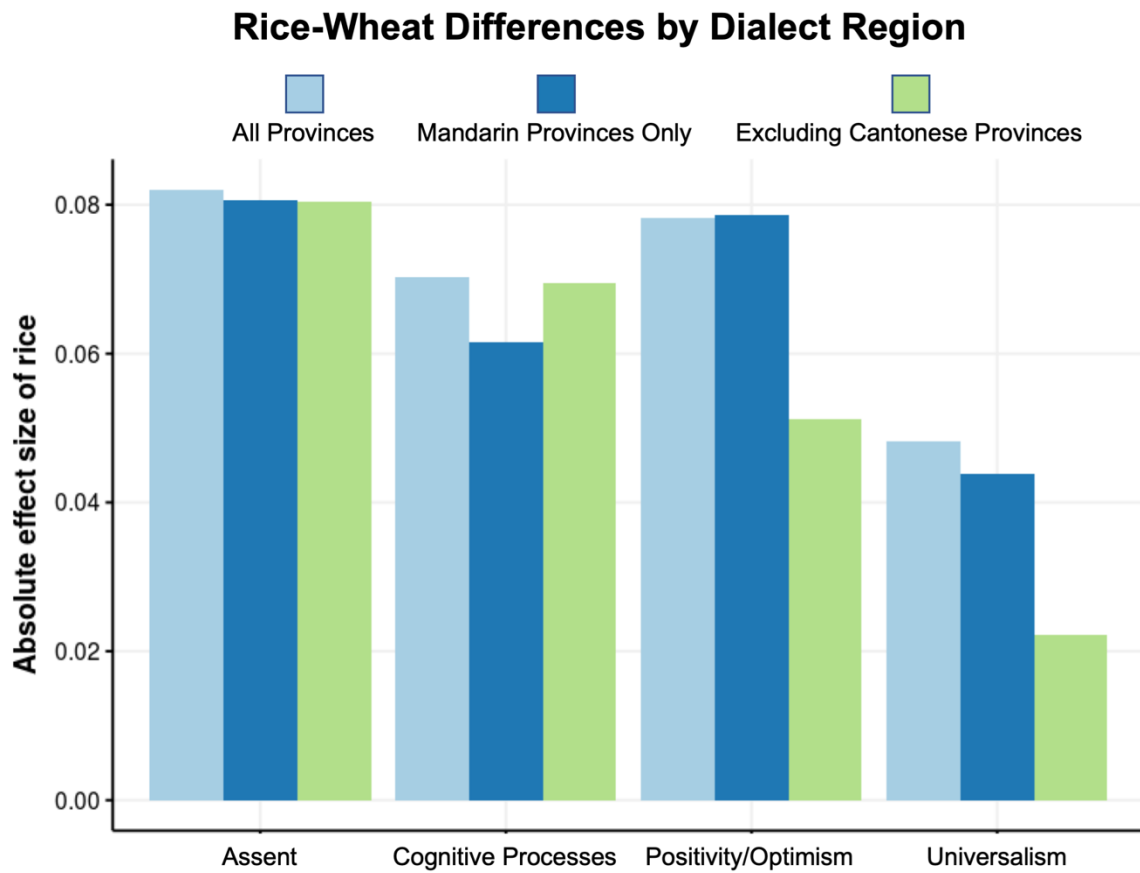

*Note:* To test whether differences in dialects are confounding the results, we ran analyses testing rice-wheat differences among all provinces (light blue) and then only for provinces in the Mandarin dialect group (dark blue). Green bars exclude Cantonese, which is the dialect outside of Mandarin with arguably the most developed writing system. Effect sizes are individual-level standardized regression coefficients. Effect sizes tend to be larger at the group level.

**Table S1A**  
*Variables Tested, Sources, and Rationale in China*

| Variable                                              | Measure                                                       | Source                                                                                 | Rationale                                                                                                                                                                                                                                    |
|-------------------------------------------------------|---------------------------------------------------------------|----------------------------------------------------------------------------------------|----------------------------------------------------------------------------------------------------------------------------------------------------------------------------------------------------------------------------------------------|
| % Rice: Province & Prefecture                         | Paddy fields area/total cultivated area                       | <i>China Statistical Yearbook</i> 1996; Provincial Statistical Yearbooks (mostly 2002) | Paddy rice required more work and coordination to build and operate irrigation systems.                                                                                                                                                      |
| Modern GDP: Province & Prefecture                     | 2014 GDP per capita                                           | <i>China Statistical Yearbook</i> 2015; <i>China City Statistical Yearbook</i> 2015    | Modernization theory argues that wealth and modernization cause cultures to become more individualistic.                                                                                                                                     |
| Historical GDP                                        | 1995 GDP per capita                                           | <i>China Stat. Yearbook</i> , 1996                                                     | Studies have found a lag between economic growth and cultural change.                                                                                                                                                                        |
| % Urban                                               | Urban residents/total population, 2016                        | <i>China Pop. &amp; Employment Statistical Yearbook</i> , 2017                         | We use urbanization to test the difference between urban and rural areas. Urbanization is also an alternative indicator of modernization.                                                                                                    |
| % Cultivated Land                                     | Hectares of cultivated land/province land                     | <i>China Statistical Yearbook</i> , 1996                                               | This measures the density of farming in general, pulling apart general farming and rice farming in particular.                                                                                                                               |
| Environmental Rice Suitability: Province & Prefecture | Environmental suitability for high-input rainfed rice         | UN Global Agro-Ecological Zones Database                                               | Environmental suitability for rice (regardless of whether people actually farm rice there) helps address reverse causality—the possibility that areas that were collectivistic to begin with chose to farm rice.                             |
| % College Graduates                                   | College graduates per school-age population, 1990, 2015       | <i>China Statistical Yearbook</i> , 1991, 2016                                         | Researchers have argued that education is an important vehicle of modernization. Education may also influence use of cognitive words. We test modern and historical statistics to account for lag in cultural change.                        |
| % Herding Cultures                                    | Traditionally herding ethnicities/total pop.                  | <i>China Population Statistical Yearbook</i> , 2002                                    | Research has found that herding cultures tend to be more individualistic than nearby farming cultures.                                                                                                                                       |
| Average Temperature                                   | Average high, low in January and July                         | <a href="#">Zuzu Che</a> Weather Records                                               | Some researchers have argued that hotter areas are more collectivistic. Temperature is correlated with disease prevalence.                                                                                                                   |
| Climatic Demands                                      | Sum dev. from 22C in avg. highs/lows July, Jan                | <a href="#">Zuzu Che</a> Weather Records                                               | Climatic demands theory argues that cultures in harsher climates should be more collectivistic.                                                                                                                                              |
| % Service Industry                                    | People employed in service jobs/employed people, 2010, 1995   | <i>China Statistical Yearbook</i> , 2011, 1996                                         | Some researchers have argued that service sector development is a better indicator of modernization than GDP. We test historical statistics because there is evidence for a lag between economic development and cultural change.            |
| % Private Industry                                    | People employed in priv. industry/employed people, 2010, 1995 | <i>China Statistical Yearbook</i> , 2011, 1996                                         | In China, the shift from the state-controlled economy to the private sector is an indicator of economic modernization beyond GDP. We test historical statistics because there is evidence for a lag between development and cultural change. |
| Internet Penetration                                  | Internet users/province population                            | China Internet Development Report, 2008                                                | Researchers have found evidence that GDP statistics in China are sometimes manipulated. Internet installation rates are less politically sensitive, presenting an alternative indicator of modernization.                                    |
| Percent Han                                           | People of Han ethnicity/province population                   | <i>China Population Statistical Yearbook</i> , 2002                                    | The percent Han could be interpreted as a measure of ethnic homogeneity (lack of diversity) or as a proxy for Confucian heritage.                                                                                                            |
| Pathogen Prevalence                                   | Human-transmitted infectious diseases rates                   | Chen et al., 1990; Statistical Yearbooks                                               | Pathogen prevalence theory argues that environments with higher rates of communicable disease tend to be more collectivistic.                                                                                                                |

**Table S1B***Variables Tested, Sources, and Rationale in Japan*

| Variable          | Measure                                    | Source                                                                                                                                                                                                                           | Rationale                                                                                                                                 |
|-------------------|--------------------------------------------|----------------------------------------------------------------------------------------------------------------------------------------------------------------------------------------------------------------------------------|-------------------------------------------------------------------------------------------------------------------------------------------|
| % Prefecture Rice | Rice planted area/total planted area, 1975 | Statistics and Information Department (2010). 7-14 Planted area and production of rice by prefecture (1985--2009).                                                                                                               | Rice required more work and coordination to build and operate irrigation systems. This made rice areas more interdependent.               |
| GDP: Prefecture   | GDP per capita, 2005                       | Cabinet Office. (2013). The 2013 annual report on prefectural-level accounts. Tokyo, Japan: Cabinet Office of Japan.                                                                                                             | Modernization theory argues that wealth and modernization cause cultures to become more individualistic.                                  |
| % Urban           | Ratio of urban inhabitants, 2005           | Statistics Bureau, Ministry of Internal Affairs and Communications. (2016). Population, Population Density, Population of Densely Inhabited Districts and Area by Prefecture, All <i>Shi</i> 市 and All <i>Gun</i> 郡 (1898-2005). | We use urbanization to test the difference between urban and rural areas. Urbanization is also an alternative indicator of modernization. |
| Education         | Percent of college graduates, 2010         | Statistics Bureau, Ministry of Internal Affairs and Communications. (2016). Social indicators by <u>prefecture</u> .                                                                                                             | Education is an important vehicle of modernization. Education may also make people more likely to cognitive process words.                |

**Table S2A**  
*Rice-Wheat Differences Hold Controlling for Temperature (Province Level)*

| Word Category           |                      | $\beta$      | $t$    | $P$     | Word Category |                         | $\beta$      | $t$    | $P$     | Word Category |                     | $\beta$      | $t$    | $P$     |         |
|-------------------------|----------------------|--------------|--------|---------|---------------|-------------------------|--------------|--------|---------|---------------|---------------------|--------------|--------|---------|---------|
| Cognition and Discourse | Cognitive Processes  | Female       | 0.08   | 40.98   | < 0.001       | Universalism            | Female       | -0.08  | -36.86  | < 0.001       | Positivity/Optimism | Female       | 0.001  | 0.67    | 0.504   |
|                         |                      | GDP          | 0.01   | 0.28    | 0.780         |                         | GDP          | -0.01  | -0.22   | 0.828         |                     | GDP          | -0.02  | -0.37   | 0.712   |
|                         |                      | % Urban      | -0.05  | -0.93   | 0.365         |                         | % Urban      | 0.01   | 0.22    | 0.827         |                     | % Urban      | -0.01  | -0.24   | 0.815   |
|                         |                      | % Herding    | 0.01   | 0.96    | 0.345         |                         | % Herding    | 0.01   | 1.71    | 0.100         |                     | % Herding    | 0.01   | 1.17    | 0.252   |
|                         |                      | % Cult. Land | -0.01  | -0.57   | 0.574         |                         | % Cult. Land | -0.01  | -1.00   | 0.330         |                     | % Cult. Land | -0.01  | -0.44   | 0.666   |
|                         |                      | Temperature  | 0.0004 | 0.03    | 0.978         |                         | Temperature  | -0.01  | -0.96   | 0.344         |                     | Temperature  | 0.01   | 0.67    | 0.509   |
|                         | Rice %               | -0.07        | -3.53  | 0.002   | Rice %        | -0.04                   | -2.63        | 0.016  | Rice %  | -0.09         | -3.78               | 0.001        |        |         |         |
|                         | Causation            | Female       | -0.12  | -58.55  | < 0.001       | Humans                  | Female       | 0.11   | 55.51   | < 0.001       | Achievement         | Female       | -0.21  | -109.01 | < 0.001 |
|                         |                      | GDP          | 0.01   | 0.21    | 0.838         |                         | GDP          | -0.02  | -0.29   | 0.772         |                     | GDP          | 0.002  | 0.04    | 0.971   |
|                         |                      | % Urban      | -0.01  | -0.11   | 0.916         |                         | % Urban      | -0.03  | -0.45   | 0.655         |                     | % Urban      | 0.01   | 0.19    | 0.849   |
|                         |                      | % Herding    | 0.01   | 1.35    | 0.189         |                         | % Herding    | 0.02   | 1.91    | 0.069         |                     | % Herding    | 0.01   | 0.96    | 0.345   |
|                         |                      | % Cult. Land | 0.004  | 0.21    | 0.833         |                         | % Cult. Land | -0.01  | -0.41   | 0.686         |                     | % Cult. Land | 0.005  | 0.25    | 0.806   |
|                         |                      | Temperature  | 0.005  | 0.31    | 0.759         |                         | Temperature  | 0.004  | 0.25    | 0.805         |                     | Temperature  | 0.001  | 0.06    | 0.953   |
|                         | Rice %               | -0.07        | -3.58  | 0.002   | Rice %        | -0.08                   | -3.28        | 0.003  | Rice %  | -0.07         | -3.04               | 0.006        |        |         |         |
|                         | Certainty            | Female       | 0.09   | 45.00   | < 0.001       | In/Outgroup: Connecting | Female       | 0.0002 | 0.12    | 0.906         | Fashion and Trends  | Female       | 0.04   | 15.56   | < 0.001 |
|                         |                      | GDP          | -0.01  | -0.19   | 0.850         |                         | GDP          | 0.01   | 0.40    | 0.695         |                     | GDP          | -0.004 | -0.12   | 0.908   |
|                         |                      | % Urban      | -0.02  | -0.60   | 0.556         |                         | % Urban      | -0.05  | -1.57   | 0.133         |                     | % Urban      | 0.01   | 0.37    | 0.712   |
|                         |                      | % Herding    | 0.01   | 0.71    | 0.485         |                         | % Herding    | 0.02   | 2.39    | 0.025         |                     | % Herding    | 0.003  | 0.44    | 0.662   |
|                         |                      | % Cult. Land | -0.02  | -1.37   | 0.186         |                         | % Cult. Land | -0.02  | -1.60   | 0.127         |                     | % Cult. Land | 0.01   | 0.45    | 0.657   |
|                         |                      | Temperature  | -0.01  | -0.60   | 0.551         |                         | Temperature  | 0.0004 | 0.04    | 0.966         |                     | Temperature  | -0.004 | -0.40   | 0.691   |
|                         | Rice %               | -0.05        | -3.38  | 0.003   | Rice %        | -0.02                   | -1.61        | 0.126  | Rice %  | 0.01          | 0.74                | 0.466        |        |         |         |
|                         | Possibility/Openness | Female       | 0.08   | 37.82   | < 0.001       | In/Outgroup: Dividing   | Female       | -0.01  | -2.91   | 0.004         | Affect              | Female       | 0.26   | 137.08  | < 0.001 |
|                         |                      | GDP          | 0.01   | 0.36    | 0.722         |                         | GDP          | -0.11  | -2.17   | 0.043         |                     | GDP          | -0.03  | -0.65   | 0.523   |
|                         |                      | % Urban      | -0.04  | -0.87   | 0.396         |                         | % Urban      | 0.14   | 2.53    | 0.022         |                     | % Urban      | -0.03  | -0.70   | 0.490   |
| % Herding               |                      | 0.004        | 0.47   | 0.646   | % Herding     |                         | 0.01         | 0.47   | 0.641   | % Herding     |                     | 0.02         | 1.67   | 0.108   |         |
| % Cult. Land            |                      | -0.01        | -0.89  | 0.383   | % Cult. Land  |                         | 0.01         | 0.31   | 0.762   | % Cult. Land  |                     | -0.02        | -1.52  | 0.144   |         |
| Temperature             |                      | 0.004        | 0.31   | 0.761   | Temperature   |                         | 0.03         | 1.44   | 0.158   | Temperature   |                     | 0.01         | 0.40   | 0.693   |         |
| Rice %                  | -0.04                | -2.66        | 0.015  | Rice %  | -0.02         | -0.73                   | 0.477        | Rice % | -0.02   | -0.92         | 0.369               |              |        |         |         |
| Assent                  | Female               | 0.18         | 93.52  | < 0.001 | Self          | Female                  | -0.05        | -17.61 | < 0.001 | Non-Fluencies | Female              | 0.18         | 90.23  | < 0.001 |         |
|                         | GDP                  | -0.003       | -0.05  | 0.959   |               | GDP                     | -0.01        | -0.31  | 0.762   |               | GDP                 | -0.01        | -0.15  | 0.880   |         |
|                         | % Urban              | -0.02        | -0.30  | 0.770   |               | % Urban                 | 0.03         | 0.68   | 0.503   |               | % Urban             | -0.01        | -0.13  | 0.897   |         |
|                         | % Herding            | -0.01        | -0.70  | 0.490   |               | % Herding               | -0.01        | -0.64  | 0.528   |               | % Herding           | -0.005       | -0.41  | 0.683   |         |
|                         | % Cult. Land         | -0.01        | -0.38  | 0.707   |               | % Cult. Land            | -0.01        | -1.12  | 0.277   |               | % Cult. Land        | -0.01        | -0.38  | 0.706   |         |
|                         | Temperature          | 0.005        | 0.27   | 0.786   |               | Temperature             | 0.01         | 0.47   | 0.642   |               | Temperature         | -0.003       | -0.16  | 0.876   |         |
| Rice %                  | 0.08                 | 3.32         | 0.003  | Rice %  | -0.02         | -1.14                   | 0.269        | Rice % | 0.06    | 2.87          | 0.009               |              |        |         |         |

Note: This table tests yearly average temperature per province. Table S2B tests temperature at the prefecture level. Yearly average temperature (C) is the average highs and lows of January and July for the capital city of each province. GDP per capita statistics are from 2012 in RMB. The main text tables use 2014 GDP at the request of a reviewer but the two correlate  $r = 0.99$ .

**Table S2B***Differences Between Rice and Wheat Prefectures Are Independent from Temperature*

| Word Category           |                      | $\beta$ | $t$    | $P$     | Word Category |                         | $\beta$ | $t$     | $P$     | Word Category |                     | $\beta$ | $t$   | $P$     |         |
|-------------------------|----------------------|---------|--------|---------|---------------|-------------------------|---------|---------|---------|---------------|---------------------|---------|-------|---------|---------|
| Cognition and Discourse | Cognitive Processes  | Female  | 0.08   | 24.19   | < 0.001       | Universalism            | Female  | -0.09   | -23.28  | < 0.001       | Positivity/Optimism | Female  | -0.01 | -1.69   | 0.091   |
|                         |                      | GDP     | -0.03  | -4.84   | < 0.001       |                         | GDP     | 0.002   | 0.29    | 0.772         |                     | GDP     | -0.04 | -5.51   | < 0.001 |
|                         |                      | Temp.   | -0.001 | -0.10   | 0.920         |                         | Temp.   | -0.03   | -3.63   | < 0.001       |                     | Temp.   | 0.004 | 0.45    | 0.654   |
|                         |                      | Rice %  | -0.08  | -7.48   | < 0.001       |                         | Rice %  | -0.02   | -3.01   | 0.003         |                     | Rice %  | -0.08 | -7.14   | < 0.001 |
|                         | Causation            | Female  | -0.13  | -37.55  | < 0.001       | Humans                  | Female  | 0.12    | 33.91   | < 0.001       | Achievement         | Female  | -0.23 | -67.35  | < 0.001 |
|                         |                      | GDP     | 0.01   | 1.63    | 0.105         |                         | GDP     | -0.04   | -6.27   | < 0.001       |                     | GDP     | 0.02  | 2.48    | 0.014   |
|                         |                      | Temp.   | -0.02  | -2.59   | 0.010         |                         | Temp.   | -0.02   | -2.20   | 0.029         |                     | Temp.   | -0.02 | -2.21   | 0.028   |
|                         |                      | Rice %  | -0.06  | -6.49   | < 0.001       |                         | Rice %  | -0.06   | -5.48   | < 0.001       |                     | Rice %  | -0.06 | -5.65   | < 0.001 |
|                         | Certainty            | Female  | 0.10   | 27.61   | < 0.001       | In/Outgroup: Connecting | Female  | -0.0005 | -0.13   | 0.900         | Fashion and Trends  | Female  | 0.02  | 3.87    | < 0.001 |
|                         |                      | GDP     | -0.04  | -5.72   | < 0.001       |                         | GDP     | -0.04   | -8.30   | < 0.001       |                     | GDP     | 0.02  | 2.85    | 0.005   |
|                         |                      | Temp.   | -0.01  | -1.15   | 0.252         |                         | Temp.   | -0.01   | -0.85   | 0.397         |                     | Temp.   | -0.01 | -1.42   | 0.157   |
|                         |                      | Rice %  | -0.06  | -6.03   | < 0.001       |                         | Rice %  | -0.03   | -3.63   | < 0.001       |                     | Rice %  | 0.02  | 2.11    | 0.036   |
|                         | Possibility/Openness | Female  | 0.08   | 22.96   | < 0.001       | In/Outgroup: Dividing   | Female  | -0.03   | -3.40   | < 0.001       | Affect              | Female  | 0.28  | 82.18   | < 0.001 |
|                         |                      | GDP     | -0.03  | -4.76   | < 0.001       |                         | GDP     | 0.01    | 0.88    | 0.382         |                     | GDP     | -0.06 | -8.75   | < 0.001 |
|                         |                      | Temp.   | 0.02   | 2.26    | 0.025         |                         | Temp.   | 0.02    | 1.48    | 0.141         |                     | Temp.   | 0.02  | 1.96    | 0.050   |
|                         |                      | Rice %  | -0.06  | -6.24   | < 0.001       |                         | Rice %  | -0.02   | -1.35   | 0.181         |                     | Rice %  | -0.04 | -3.23   | 0.001   |
| Assent                  | Female               | 0.21    | 59.97  | < 0.001 | Self          | Female                  | -0.05   | -10.49  | < 0.001 | Non-Fluencies | Female              | 0.20    | 57.61 | < 0.001 |         |
|                         | GDP                  | -0.02   | -2.48  | 0.014   |               | GDP                     | 0.01    | 1.75    | 0.081   |               | GDP                 | -0.01   | -2.30 | 0.022   |         |
|                         | Temp.                | 0.04    | 4.79   | < 0.001 |               | Temp.                   | 0.02    | 1.75    | 0.082   |               | Temp.               | 0.03    | 3.87  | < 0.001 |         |
|                         | Rice %               | 0.04    | 3.59   | < 0.001 |               | Rice %                  | -0.02   | -2.08   | 0.040   |               | Rice %              | 0.02    | 2.48  | 0.014   |         |

Note: Analyses are hierarchical linear models nested in prefectures. Yearly average temperature (Celsius) is the average highs and lows of January and July for the capital city of each province. GDP statistics are from 2012 in RMB. The analyses in the main text use 2014 GDP at the request of a reviewer, but 2012 and 2014 prefecture GDP correlate  $r = 0.98$ , so the difference is negligible.

**Table S3A**

*Rice-Wheat Differences Are Robust to Differences in Education*

| Word Category           |                      | $\beta$      | $t$   | $P$     | Word Category |                         | $\beta$      | $t$    | $P$     | Word Category             |                     | $\beta$      | $t$   | $P$     |         |
|-------------------------|----------------------|--------------|-------|---------|---------------|-------------------------|--------------|--------|---------|---------------------------|---------------------|--------------|-------|---------|---------|
| Cognition and Discourse | Cognitive Processes  | Female       | 0.08  | 40.98   | < 0.001       | Universalism            | Female       | -0.08  | -36.85  | < 0.001                   | Positivity/Optimism | Female       | 0.001 | 0.66    | 0.510   |
|                         |                      | % College    | -0.06 | -1.72   | 0.101         |                         | % College    | 0.01   | 0.40    | 0.694                     |                     | % College    | -0.07 | -1.71   | 0.101   |
|                         |                      | % Urban      | 0.01  | 0.26    | 0.798         |                         | % Urban      | -0.01  | -0.29   | 0.774                     |                     | % Urban      | 0.01  | 0.37    | 0.714   |
|                         |                      | % Herding    | 0.01  | 1.09    | 0.286         |                         | % Herding    | 0.02   | 2.39    | 0.024                     |                     | % Herding    | 0.01  | 0.83    | 0.412   |
|                         |                      | % Cult. Land | -0.02 | -1.04   | 0.312         |                         | % Cult. Land | -0.01  | -0.77   | 0.452                     |                     | % Cult. Land | -0.02 | -1.14   | 0.265   |
|                         |                      | Rice %       | -0.08 | -5.07   | < 0.001       |                         | Rice %       | -0.04  | -3.26   | 0.004                     |                     | Rice %       | -0.09 | -4.81   | < 0.001 |
|                         | Causation            | Female       | -0.12 | -58.55  | < 0.001       | Humans                  | Female       | 0.11   | 55.50   | < 0.001                   | Achievement         | Female       | -0.21 | -109.01 | < 0.001 |
|                         |                      | % College    | 0.004 | 0.11    | 0.913         |                         | % College    | -0.06  | -1.51   | 0.145                     |                     | % College    | 0.001 | 0.04    | 0.971   |
|                         |                      | % Urban      | 0.001 | 0.05    | 0.962         |                         | % Urban      | -0.001 | -0.04   | 0.970                     |                     | % Urban      | 0.01  | 0.36    | 0.723   |
|                         |                      | % Herding    | 0.01  | 1.54    | 0.138         |                         | % Herding    | 0.02   | 1.99    | 0.058                     |                     | % Herding    | 0.01  | 1.43    | 0.165   |
|                         |                      | % Cult. Land | 0.004 | 0.24    | 0.809         |                         | % Cult. Land | -0.02  | -0.96   | 0.347                     |                     | % Cult. Land | 0.005 | 0.27    | 0.792   |
|                         |                      | Rice %       | -0.07 | -3.83   | < 0.001       |                         | Rice %       | -0.09  | -4.40   | < 0.001                   |                     | Rice %       | -0.07 | -3.40   | 0.002   |
|                         | Certainty            | Female       | 0.09  | 45.01   | < 0.001       | In/Outgroup: Connecting | Female       | 0.0003 | 0.12    | 0.904                     | Fashion and Trends  | Female       | 0.04  | 15.56   | < 0.001 |
|                         |                      | % College    | -0.03 | -1.20   | 0.247         |                         | % College    | 0.02   | 0.98    | 0.340                     |                     | % College    | -0.02 | -1.08   | 0.295   |
|                         |                      | % Urban      | -0.01 | -0.32   | 0.755         |                         | % Urban      | -0.06  | -2.92   | 0.009                     |                     | % Urban      | 0.03  | 1.41    | 0.172   |
|                         |                      | % Herding    | 0.01  | 0.94    | 0.357         |                         | % Herding    | 0.02   | 3.03    | 0.005                     |                     | % Herding    | 0.003 | 0.57    | 0.575   |
|                         |                      | % Cult. Land | -0.02 | -1.70   | 0.104         |                         | % Cult. Land | -0.01  | -1.29   | 0.213                     |                     | % Cult. Land | 0.002 | 0.21    | 0.835   |
|                         |                      | Rice %       | -0.07 | -4.78   | < 0.001       |                         | Rice %       | -0.02  | -1.38   | 0.181                     |                     | Rice %       | 0.001 | 0.10    | 0.922   |
|                         | Possibility/Openness | Female       | 0.08  | 37.81   | < 0.001       | In/Outgroup: Dividing   | Female       | -0.01  | -2.93   | 0.003                     | Affect              | Female       | 0.26  | 137.09  | < 0.001 |
|                         |                      | % College    | -0.06 | -2.50   | 0.021         |                         | % College    | 0.04   | 0.89    | 0.386                     |                     | % College    | -0.08 | -2.78   | 0.012   |
|                         |                      | % Urban      | 0.02  | 1.10    | 0.282         |                         | % Urban      | -0.004 | -0.12   | 0.908                     |                     | % Urban      | -0.01 | -0.26   | 0.801   |
|                         |                      | % Herding    | 0.002 | 0.29    | 0.775         |                         | % Herding    | -0.01  | -0.49   | 0.626                     |                     | % Herding    | 0.01  | 1.52    | 0.139   |
|                         |                      | % Cult. Land | -0.02 | -1.70   | 0.105         |                         | % Cult. Land | -0.004 | -0.21   | 0.837                     |                     | % Cult. Land | -0.04 | -2.82   | 0.010   |
|                         |                      | Rice %       | -0.06 | -4.39   | < 0.001       |                         | Rice %       | 0.02   | 0.80    | 0.434                     |                     | Rice %       | -0.03 | -2.12   | 0.045   |
| Assent                  | Female               | 0.18         | 93.53 | < 0.001 | Self          | Female                  | -0.05        | -17.62 | < 0.001 | Cog. & Dis. Non-Fluencies | Female              | 0.18         | 90.23 | < 0.001 |         |
|                         | % College            | 0.03         | 0.81  | 0.429   |               | % College               | -0.02        | -0.62  | 0.540   |                           | % College           | -0.01        | -0.38 | 0.709   |         |
|                         | % Urban              | -0.04        | -1.30 | 0.206   |               | % Urban                 | 0.03         | 1.20   | 0.242   |                           | % Urban             | -0.005       | -0.15 | 0.884   |         |
|                         | % Herding            | -0.01        | -0.88 | 0.386   |               | % Herding               | -0.01        | -1.13  | 0.268   |                           | % Herding           | -0.005       | -0.51 | 0.615   |         |
|                         | % Cult. Land         | -0.005       | -0.24 | 0.812   |               | % Cult. Land            | -0.02        | -1.50  | 0.150   |                           | % Cult. Land        | -0.01        | -0.51 | 0.618   |         |
|                         | Rice %               | 0.09         | 4.39  | < 0.001 |               | Rice %                  | -0.02        | -1.25  | 0.226   |                           | Rice %              | 0.06         | 3.01  | 0.006   |         |

Note: Analyses are hierarchical linear models nested in provinces. Percent college graduates are college graduates per school-age population in the year 2015, derived from *China Statistical Yearbook 2016*. We use this as a proxy for differences in education levels for different provinces.

**Table S3B**

*Rice-Wheat Differences Are Robust to Differences in Time-Lagged Education*

| Word Category           |                      | $\beta$      | $t$    | $P$     | Word Category | $\beta$                 | $t$          | $P$    | Word Category | $\beta$                   | $t$                 | $P$          |       |         |         |
|-------------------------|----------------------|--------------|--------|---------|---------------|-------------------------|--------------|--------|---------------|---------------------------|---------------------|--------------|-------|---------|---------|
| Cognition and Discourse | Cognitive Processes  | Female       | 0.08   | 40.99   | < 0.001       | Universalism            | Female       | -0.08  | -36.86        | < 0.001                   | Positivity/Optimism | Female       | 0.001 | 0.66    | 0.509   |
|                         |                      | % Coll. 1990 | -0.08  | -2.89   | 0.009         |                         | % Coll. 1990 | 0.01   | 0.26          | 0.796                     |                     | % Coll. 1990 | -0.09 | -2.70   | 0.013   |
|                         |                      | % Urban      | 0.02   | 0.96    | 0.347         |                         | % Urban      | -0.003 | -0.16         | 0.872                     |                     | % Urban      | 0.03  | 0.96    | 0.347   |
|                         |                      | % Herding    | 0.01   | 1.33    | 0.193         |                         | % Herding    | 0.02   | 2.36          | 0.026                     |                     | % Herding    | 0.01  | 1.04    | 0.307   |
|                         |                      | % Cult. Land | -0.02  | -1.14   | 0.268         |                         | % Cult. Land | -0.01  | -0.85         | 0.404                     |                     | % Cult. Land | -0.02 | -1.21   | 0.240   |
|                         |                      | Rice %       | -0.09  | -5.99   | < 0.001       |                         | Rice %       | -0.05  | -3.47         | 0.002                     |                     | Rice %       | -0.10 | -5.55   | < 0.001 |
|                         | Causation            | Female       | -0.12  | -58.56  | < 0.001       | Humans                  | Female       | 0.11   | 55.50         | < 0.001                   | Achievement         | Female       | -0.21 | -109.01 | < 0.001 |
|                         |                      | % Coll. 1990 | -0.05  | -1.53   | 0.140         |                         | % Coll. 1990 | -0.08  | -2.29         | 0.031                     |                     | % Coll. 1990 | -0.04 | -1.24   | 0.229   |
|                         |                      | % Urban      | 0.04   | 1.44    | 0.165         |                         | % Urban      | 0.01   | 0.38          | 0.707                     |                     | % Urban      | 0.04  | 1.46    | 0.157   |
|                         |                      | % Herding    | 0.01   | 1.58    | 0.127         |                         | % Herding    | 0.02   | 2.24          | 0.034                     |                     | % Herding    | 0.01  | 1.45    | 0.158   |
|                         |                      | % Cult. Land | -0.001 | -0.04   | 0.969         |                         | % Cult. Land | -0.02  | -0.98         | 0.337                     |                     | % Cult. Land | 0.001 | 0.05    | 0.957   |
|                         |                      | Rice %       | -0.08  | -4.82   | < 0.001       |                         | Rice %       | -0.09  | -4.93         | < 0.001                   |                     | Rice %       | -0.08 | -4.15   | < 0.001 |
|                         | Certainty            | Female       | 0.09   | 45.01   | < 0.001       | In/Outgroup: Connecting | Female       | 0.0003 | 0.12          | 0.905                     | Fashion and Trends  | Female       | 0.04  | 15.57   | < 0.001 |
|                         |                      | % Coll. 1990 | -0.05  | -2.05   | 0.053         |                         | % Coll. 1990 | 0.01   | 0.32          | 0.756                     |                     | % Coll. 1990 | -0.02 | -0.77   | 0.451   |
|                         |                      | % Urban      | 0.004  | 0.19    | 0.854         |                         | % Urban      | -0.05  | -2.45         | 0.023                     |                     | % Urban      | 0.02  | 1.16    | 0.259   |
|                         |                      | % Herding    | 0.01   | 1.07    | 0.294         |                         | % Herding    | 0.02   | 2.91          | 0.007                     |                     | % Herding    | 0.004 | 0.66    | 0.515   |
|                         |                      | % Cult. Land | -0.02  | -1.85   | 0.079         |                         | % Cult. Land | -0.02  | -1.53         | 0.142                     |                     | % Cult. Land | 0.004 | 0.38    | 0.708   |
|                         |                      | Rice %       | -0.07  | -5.44   | < 0.001       |                         | Rice %       | -0.02  | -1.76         | 0.093                     |                     | Rice %       | 0.004 | 0.32    | 0.753   |
|                         | Possibility/Openness | Female       | 0.08   | 37.82   | < 0.001       | In/Outgroup: Dividing   | Female       | -0.01  | -2.93         | 0.003                     | Affect              | Female       | 0.26  | 137.09  | < 0.001 |
|                         |                      | % Coll. 1990 | -0.08  | -3.40   | 0.003         |                         | % Coll. 1990 | 0.02   | 0.58          | 0.568                     |                     | % Coll. 1990 | -0.05 | -1.75   | 0.095   |
|                         |                      | % Urban      | 0.03   | 1.61    | 0.122         |                         | % Urban      | 0.01   | 0.18          | 0.857                     |                     | % Urban      | -0.03 | -1.16   | 0.259   |
|                         |                      | % Herding    | 0.003  | 0.50    | 0.620         |                         | % Herding    | -0.01  | -0.56         | 0.576                     |                     | % Herding    | 0.01  | 1.66    | 0.109   |
|                         |                      | % Cult. Land | -0.02  | -1.74   | 0.097         |                         | % Cult. Land | -0.01  | -0.36         | 0.726                     |                     | % Cult. Land | -0.03 | -2.24   | 0.036   |
|                         |                      | Rice %       | -0.06  | -5.00   | < 0.001       |                         | Rice %       | 0.01   | 0.62          | 0.540                     |                     | Rice %       | -0.02 | -1.47   | 0.156   |
| Assent                  | Female               | 0.18         | 93.53  | < 0.001 | Self          | Female                  | -0.05        | -17.62 | < 0.001       | Cog. & Dis. Non-Fluencies | Female              | 0.18         | 90.23 | < 0.001 |         |
|                         | % Coll. 1990         | 0.05         | 1.49   | 0.152   |               | % Coll. 1990            | -0.03        | -1.10  | 0.286         |                           | % Coll. 1990        | 0.01         | 0.39  | 0.702   |         |
|                         | % Urban              | -0.06        | -1.92  | 0.068   |               | % Urban                 | 0.03         | 1.65   | 0.112         |                           | % Urban             | -0.02        | -0.84 | 0.412   |         |
|                         | % Herding            | -0.01        | -0.98  | 0.335   |               | % Herding               | -0.01        | -1.13  | 0.267         |                           | % Herding           | -0.004       | -0.46 | 0.649   |         |
|                         | % Cult. Land         | -0.004       | -0.24  | 0.812   |               | % Cult. Land            | -0.02        | -1.60  | 0.125         |                           | % Cult. Land        | -0.01        | -0.34 | 0.736   |         |
|                         | Rice %               | 0.09         | 4.89   | < 0.001 |               | Rice %                  | -0.02        | -1.46  | 0.160         |                           | Rice %              | 0.06         | 3.47  | 0.002   |         |

Note: Analyses are hierarchical linear models nested in provinces. Percent college graduates are college graduates per school-age population in the year 1990, derived from *China Statistical Yearbook* 1991. We use this as a measure of regional differences in education in recent history.

**Table S4A**

*Differences Between Rice and Wheat Provinces Are Robust to Users' Age*

| Word Category           |                      | $\beta$ | $t$     | $P$     | Word Category |                         | $\beta$ | $t$   | $P$   | Word Category |                     | $\beta$ | $t$   | $P$     |         |
|-------------------------|----------------------|---------|---------|---------|---------------|-------------------------|---------|-------|-------|---------------|---------------------|---------|-------|---------|---------|
| Cognition and Discourse | Cognitive Processes  | Female  | 0.09    | 8.33    | < 0.001       | Universalism            | Female  | -0.08 | -6.66 | < 0.001       | Positivity/Optimism | Female  | 0.02  | 1.61    | 0.108   |
|                         |                      | Age     | 0.03    | 2.44    | 0.015         |                         | Age     | 0.03  | 2.89  | 0.004         |                     | Age     | 0.04  | 3.59    | < 0.001 |
|                         |                      | GDP     | -0.02   | -0.39   | 0.702         |                         | GDP     | -0.11 | -1.61 | 0.128         |                     | GDP     | -0.05 | -0.69   | 0.500   |
|                         |                      | % Urban | -0.03   | -0.45   | 0.665         |                         | % Urban | 0.11  | 1.52  | 0.155         |                     | % Urban | 0.01  | 0.08    | 0.934   |
|                         |                      | Rice %  | -0.08   | -4.63   | 0.002         |                         | Rice %  | -0.07 | -3.17 | 0.008         |                     | Rice %  | -0.11 | -4.70   | < 0.001 |
|                         | Causation            | Female  | -0.11   | -9.75   | < 0.001       | Humans                  | Female  | 0.12  | 10.50 | < 0.001       | Achievement         | Female  | -0.20 | -18.41  | < 0.001 |
|                         |                      | Age     | 0.09    | 7.91    | < 0.001       |                         | Age     | 0.04  | 3.25  | 0.001         |                     | Age     | 0.09  | 8.56    | < 0.001 |
|                         |                      | GDP     | 0.01    | 0.15    | 0.880         |                         | GDP     | -0.04 | -0.46 | 0.652         |                     | GDP     | -0.05 | -0.63   | 0.537   |
|                         |                      | % Urban | -0.01   | -0.14   | 0.890         |                         | % Urban | -0.02 | -0.18 | 0.862         |                     | % Urban | 0.05  | 0.62    | 0.544   |
|                         |                      | Rice %  | -0.09   | -3.79   | 0.002         |                         | Rice %  | -0.10 | -3.53 | 0.003         |                     | Rice %  | -0.10 | -4.42   | < 0.001 |
|                         | Certainty            | Female  | 0.11    | 10.08   | < 0.001       | In/Outgroup: Connecting | Female  | 0.01  | 0.99  | 0.321         | Fashion and Trends  | Female  | 0.04  | 2.96    | 0.003   |
|                         |                      | Age     | -0.0004 | -0.04   | 0.969         |                         | Age     | 0.01  | 0.58  | 0.563         |                     | Age     | 0.01  | 0.58    | 0.564   |
|                         |                      | GDP     | -0.07   | -1.08   | 0.302         |                         | GDP     | -0.17 | -3.04 | 0.022         |                     | GDP     | -0.08 | -1.36   | 0.190   |
|                         |                      | % Urban | 0.02    | 0.34    | 0.739         |                         | % Urban | 0.11  | 1.89  | 0.120         |                     | % Urban | 0.08  | 1.35    | 0.198   |
|                         |                      | Rice %  | -0.07   | -3.83   | 0.003         |                         | Rice %  | -0.06 | -3.35 | 0.023         |                     | Rice %  | 0.02  | 1.42    | 0.177   |
|                         | Possibility/Openness | Female  | 0.08    | 7.50    | < 0.001       | In/Outgroup: Dividing   | Female  | 0.01  | 0.33  | 0.743         | Affect              | Female  | 0.26  | 24.05   | < 0.001 |
|                         |                      | Age     | 0.02    | 1.86    | 0.063         |                         | Age     | -0.02 | -0.67 | 0.504         |                     | Age     | -0.04 | -4.01   | < 0.001 |
|                         |                      | GDP     | 0.003   | 0.05    | 0.962         |                         | GDP     | -0.19 | -1.56 | 0.120         |                     | GDP     | -0.05 | -0.68   | 0.511   |
|                         |                      | % Urban | -0.05   | -0.65   | 0.532         |                         | % Urban | 0.21  | 1.76  | 0.079         |                     | % Urban | -0.02 | -0.27   | 0.796   |
|                         |                      | Rice %  | -0.04   | -2.02   | 0.075         |                         | Rice %  | -0.02 | -0.72 | 0.469         |                     | Rice %  | -0.02 | -1.17   | 0.269   |
| Assent                  | Female               | 0.16    | 14.61   | < 0.001 | Self          | Female                  | -0.03   | -2.18 | 0.029 | Non-Fluencies | Female              | 0.17    | 15.59 | < 0.001 |         |
|                         | Age                  | -0.09   | -7.82   | < 0.001 |               | Age                     | 0.04    | 2.97  | 0.003 |               | Age                 | -0.08   | -7.13 | < 0.001 |         |
|                         | GDP                  | 0.01    | 0.07    | 0.948   |               | GDP                     | 0.05    | 0.59  | 0.562 |               | GDP                 | -0.05   | -0.67 | 0.515   |         |
|                         | % Urban              | -0.04   | -0.39   | 0.704   |               | % Urban                 | -0.06   | -0.65 | 0.521 |               | % Urban             | 0.02    | 0.29  | 0.779   |         |
|                         | Rice %               | 0.10    | 3.41    | 0.007   |               | Rice %                  | 0.02    | 0.96  | 0.353 |               | Rice %              | 0.07    | 3.15  | 0.012   |         |

Note: Analyses are hierarchical linear models nested in provinces. Provincial GDP per capita statistics are from 2012 in RMB. The analyses in the main text use 2014 GDP at the request of a reviewer, but 2012 and 2014 GDP correlate  $r = 0.99$ , so the difference is negligible.

**Table S4B***Differences Between Rice and Wheat Prefectures Are Robust to Users' Age*

| Word Category           |                      | $\beta$ | $t$    | $P$   | Word Category |                         | $\beta$ | $t$    | $P$   | Word Category |                     | $\beta$ | $t$   | $P$    |         |
|-------------------------|----------------------|---------|--------|-------|---------------|-------------------------|---------|--------|-------|---------------|---------------------|---------|-------|--------|---------|
| Cognition and Discourse | Cognitive Processes  | Female  | 0.09   | 7.40  | < 0.001       | Universalism            | Female  | -0.08  | -6.21 | < 0.001       | Positivity/Optimism | Female  | 0.02  | 1.24   | 0.216   |
|                         |                      | Age     | 0.02   | 2.04  | 0.041         |                         | Age     | 0.03   | 2.58  | 0.010         |                     | Age     | 0.04  | 3.27   | 0.001   |
|                         |                      | GDP     | -0.04  | -2.85 | 0.005         |                         | GDP     | 0.02   | 1.50  | 0.140         |                     | GDP     | -0.04 | -2.67  | 0.009   |
|                         |                      | Rice %  | -0.08  | -5.35 | < 0.001       |                         | Rice %  | -0.04  | -2.65 | 0.012         |                     | Rice %  | -0.08 | -4.89  | < 0.001 |
|                         | Causation            | Female  | -0.12  | -9.99 | < 0.001       | Humans                  | Female  | 0.11   | 9.73  | < 0.001       | Achievement         | Female  | -0.20 | -17.59 | < 0.001 |
|                         |                      | Age     | 0.09   | 7.66  | < 0.001       |                         | Age     | 0.03   | 2.39  | 0.017         |                     | Age     | 0.09  | 8.00   | < 0.001 |
|                         |                      | GDP     | 0.02   | 1.37  | 0.173         |                         | GDP     | -0.04  | -3.18 | 0.002         |                     | GDP     | 0.01  | 1.09   | 0.278   |
|                         |                      | Rice %  | -0.09  | -6.38 | < 0.001       |                         | Rice %  | -0.08  | -5.41 | < 0.001       |                     | Rice %  | -0.09 | -5.77  | < 0.001 |
|                         | Certainty            | Female  | 0.11   | 9.14  | < 0.001       | In/Outgroup: Connecting | Female  | 0.01   | 0.89  | 0.373         | Fashion and Trends  | Female  | 0.03  | 2.30   | 0.021   |
|                         |                      | Age     | -0.004 | -0.32 | 0.747         |                         | Age     | 0.01   | 0.64  | 0.524         |                     | Age     | 0.01  | 0.58   | 0.563   |
|                         |                      | GDP     | -0.05  | -3.31 | 0.001         |                         | GDP     | -0.07  | -5.39 | < 0.001       |                     | GDP     | 0.003 | 0.23   | 0.818   |
|                         |                      | Rice %  | -0.07  | -4.66 | < 0.001       |                         | Rice %  | -0.05  | -4.05 | < 0.001       |                     | Rice %  | 0.03  | 2.28   | 0.022   |
|                         | Possibility/Openness | Female  | 0.09   | 7.22  | < 0.001       | In/Outgroup: Dividing   | Female  | 0.01   | 0.31  | 0.760         | Affect              | Female  | 0.25  | 22.21  | < 0.001 |
|                         |                      | Age     | 0.02   | 1.48  | 0.139         |                         | Age     | -0.01  | -0.42 | 0.675         |                     | Age     | -0.04 | -3.82  | < 0.001 |
|                         |                      | GDP     | -0.04  | -2.41 | 0.018         |                         | GDP     | 0.04   | 1.16  | 0.248         |                     | GDP     | -0.05 | -3.76  | < 0.001 |
|                         |                      | Rice %  | -0.04  | -2.66 | 0.009         |                         | Rice %  | -0.004 | -0.11 | 0.910         |                     | Rice %  | -0.03 | -2.01  | 0.047   |
|                         | Assent               | Female  | 0.16   | 13.79 | < 0.001       | Self                    | Female  | -0.04  | -2.64 | 0.008         | Non-fluencies       | Female  | 0.17  | 14.44  | < 0.001 |
|                         |                      | Age     | -0.09  | -7.39 | < 0.001       |                         | Age     | 0.04   | 2.67  | 0.008         |                     | Age     | -0.08 | -6.60  | < 0.001 |
|                         |                      | GDP     | -0.02  | -1.64 | 0.105         |                         | GDP     | 0.01   | 0.32  | 0.749         |                     | GDP     | -0.03 | -2.67  | 0.009   |
|                         |                      | Rice %  | 0.06   | 4.60  | < 0.001       |                         | Rice %  | 0.003  | 0.15  | 0.882         |                     | Rice %  | 0.06  | 4.67   | < 0.001 |

Note: Analyses are hierarchical linear models nested in prefectures. Age data is available for a sub-sample of Weibo users. GDP per capita is 2012 prefecture data in RMB. The analyses in the main text use 2014 GDP at the request of a reviewer, but 2012 and 2014 prefecture GDP correlate  $r = 0.98$ , so the difference is negligible.

**Table S5**

*Robustness to Dialect: Excluding Cantonese-Speaking Areas*

| Word Category           |                      | $\beta$ | $t$   | $P$     | Word Category |                         | $\beta$ | $t$    | $P$     | Word Category           |                     | $\beta$ | $t$   | $P$     |         |
|-------------------------|----------------------|---------|-------|---------|---------------|-------------------------|---------|--------|---------|-------------------------|---------------------|---------|-------|---------|---------|
| Cognition and Discourse | Cognitive Processes  | Female  | 0.08  | 35.89   | < 0.001       | Universalism            | Female  | -0.08  | -25.99  | < 0.001                 | Positivity/Optimism | Female  | 0.01  | 2.65    | 0.008   |
|                         |                      | GDP     | -0.04 | -2.74   | 0.012         |                         | GDP     | 0.03   | 1.86    | 0.100                   |                     | GDP     | -0.01 | -0.45   | 0.665   |
|                         |                      | Rice %  | -0.08 | -6.16   | < 0.001       |                         | Rice %  | -0.04  | -4.85   | < 0.001                 |                     | Rice %  | -0.06 | -5.07   | < 0.001 |
|                         | Causation            | Female  | -0.13 | -57.48  | < 0.001       | Humans                  | Female  | 0.10   | 35.52   | < 0.001                 | Achievement         | Female  | -0.22 | -103.89 | < 0.001 |
|                         |                      | GDP     | 0.004 | 0.36    | 0.724         |                         | GDP     | -0.001 | -0.05   | 0.961                   |                     | GDP     | 0.01  | 0.76    | 0.455   |
|                         |                      | Rice %  | -0.08 | -6.31   | < 0.001       |                         | Rice %  | -0.07  | -6.42   | < 0.001                 |                     | Rice %  | -0.08 | -6.08   | < 0.001 |
|                         | Certainty            | Female  | 0.09  | 39.40   | < 0.001       | In/Outgroup: Connecting | Female  | 0.001  | 0.23    | 0.815                   | Fashion and Trends  | Female  | 0.04  | 11.02   | < 0.001 |
|                         |                      | GDP     | -0.04 | -4.27   | < 0.001       |                         | GDP     | -0.03  | -1.58   | 0.152                   |                     | GDP     | 0.02  | 1.43    | 0.182   |
|                         |                      | Rice %  | -0.06 | -6.31   | < 0.001       |                         | Rice %  | -0.04  | -4.14   | 0.002                   |                     | Rice %  | 0.004 | 0.66    | 0.520   |
|                         | Possibility/Openness | Female  | 0.07  | 31.93   | < 0.001       | In/Outgroup: Dividing   | Female  | -0.01  | -2.00   | 0.046                   | Affect              | Female  | 0.27  | 128.92  | < 0.001 |
|                         |                      | GDP     | -0.03 | -2.49   | 0.021         |                         | GDP     | 0.02   | 1.08    | 0.319                   |                     | GDP     | -0.07 | -4.96   | < 0.001 |
|                         |                      | Rice %  | -0.05 | -4.29   | < 0.001       |                         | Rice %  | 0.01   | 1.12    | 0.281                   |                     | Rice %  | -0.03 | -2.22   | 0.037   |
| Assent                  | Female               | 0.20    | 92.78 | < 0.001 | Self          | Female                  | -0.04   | -10.07 | < 0.001 | Cog./Dis. Non-Fluencies | Female              | 0.19    | 86.48 | < 0.001 |         |
|                         | GDP                  | -0.02   | -1.46 | 0.160   |               | GDP                     | 0.02    | 1.50   | 0.165   |                         | GDP                 | -0.01   | -1.10 | 0.281   |         |
|                         | Rice %               | 0.09    | 7.22  | < 0.001 |               | Rice %                  | 0.005   | 0.59   | 0.562   |                         | Rice %              | 0.06    | 5.84  | < 0.001 |         |

Note: Analyses are hierarchical linear models nested in provinces. Cantonese provinces are classified as Guangxi and Guangdong (based on the *Language Atlas of China*). Provincial GDP per capita statistics are from 2012 in RMB. The analyses in the main text use 2014 GDP at the request of a reviewer, but 2012 and 2014 GDP correlate  $r = 0.99$ , so the difference is negligible.

**Table S6***Japanese Prefectures' History of Rice Farming Predicts Word Use on Weibo: Controlling for Education*

| Word Category           |                     | $\beta$   | $t$    | $P$   | Word Category |                          | $\beta$   | $t$    | $P$   |       |
|-------------------------|---------------------|-----------|--------|-------|---------------|--------------------------|-----------|--------|-------|-------|
| Cognition and Discourse | Cognitive Processes | GDP       | -0.01  | -0.41 | 0.685         | Possibility/<br>Openness | GDP       | -0.001 | -0.12 | 0.909 |
|                         |                     | % Urban   | 0.03   | 2.40  | 0.020         |                          | % Urban   | 0.01   | 1.30  | 0.202 |
|                         |                     | Education | 0.01   | 0.92  | 0.364         |                          | Education | 0.02   | 2.52  | 0.019 |
|                         |                     | Rice %    | -0.03  | -3.48 | 0.001         |                          | Rice %    | -0.02  | -2.61 | 0.016 |
|                         | Causation           | GDP       | 0.03   | 2.53  | 0.026         | Assent                   | GDP       | -0.05  | -2.89 | 0.010 |
|                         |                     | % Urban   | -0.01  | -1.16 | 0.254         |                          | % Urban   | -0.01  | -0.58 | 0.566 |
|                         |                     | Education | 0.03   | 2.99  | 0.005         |                          | Education | 0.004  | 0.28  | 0.782 |
|                         |                     | Rice %    | -0.02  | -2.07 | 0.047         |                          | Rice %    | -0.02  | -2.34 | 0.026 |
|                         | Certainty           | GDP       | -0.01  | -0.66 | 0.519         | Non-Fluencies            | GDP       | -0.03  | -1.51 | 0.144 |
|                         |                     | % Urban   | 0.01   | 1.09  | 0.283         |                          | % Urban   | 0.003  | 0.23  | 0.819 |
|                         |                     | Education | 0.003  | 0.23  | 0.820         |                          | Education | 0.002  | 0.14  | 0.889 |
|                         |                     | Rice %    | -0.02  | -2.77 | 0.009         |                          | Rice %    | -0.004 | -0.34 | 0.732 |
| Self and Groups         | Humans              | GDP       | 0.004  | 0.21  | 0.835         | Achievement              | GDP       | 0.02   | 1.22  | 0.241 |
|                         |                     | % Urban   | 0.01   | 0.86  | 0.394         |                          | % Urban   | 0.01   | 0.50  | 0.618 |
|                         |                     | Education | -0.01  | -0.39 | 0.700         |                          | Education | 0.03   | 2.49  | 0.018 |
|                         |                     | Rice %    | -0.02  | -2.13 | 0.040         |                          | Rice %    | -0.02  | -1.61 | 0.117 |
|                         | I                   | GDP       | -0.03  | -1.53 | 0.143         | We                       | GDP       | -0.004 | -0.25 | 0.803 |
|                         |                     | % Urban   | 0.01   | 0.76  | 0.450         |                          | % Urban   | 0.02   | 1.90  | 0.062 |
|                         |                     | Education | -0.001 | -0.07 | 0.943         |                          | Education | -0.02  | -1.73 | 0.091 |
|                         |                     | Rice %    | -0.02  | -2.27 | 0.030         |                          | Rice %    | -0.004 | -0.43 | 0.670 |

Note: Analyses are hierarchical linear models nested in prefectures. Prefecture rice is the percentage of rice planted area.

**Table S7***Provinces' Environmental Suitability for Rice Predicts Word Use on Weibo*

| Word Category           |                      | $\beta$      | $t$    | $P$     | Word Category |                         | $\beta$      | $t$    | $P$     | Word Category |                     | $\beta$      | $t$    | $P$     |         |
|-------------------------|----------------------|--------------|--------|---------|---------------|-------------------------|--------------|--------|---------|---------------|---------------------|--------------|--------|---------|---------|
| Cognition and Discourse | Cognitive Processes  | Female       | 0.08   | 40.97   | < 0.001       | Universalism            | Female       | -0.08  | -36.86  | < 0.001       | Positivity/Optimism | Female       | 0.001  | 0.66    | 0.510   |
|                         |                      | GDP          | 0.03   | 0.55    | 0.585         |                         | GDP          | -0.01  | -0.39   | 0.699         |                     | GDP          | 0.01   | 0.15    | 0.884   |
|                         |                      | % Urban      | -0.08  | -1.66   | 0.112         |                         | % Urban      | -0.002 | -0.06   | 0.950         |                     | % Urban      | -0.07  | -1.21   | 0.239   |
|                         |                      | % Herding    | 0.01   | 1.25    | 0.222         |                         | % Herding    | 0.02   | 2.29    | 0.030         |                     | % Herding    | 0.01   | 1.17    | 0.252   |
|                         |                      | % Cult. Land | 0.01   | 0.50    | 0.622         |                         | % Cult. Land | 0.002  | 0.16    | 0.871         |                     | % Cult. Land | 0.01   | 0.44    | 0.666   |
|                         |                      | Rice Suit.   | -0.05  | -3.09   | 0.005         |                         | Rice Suit.   | -0.04  | -3.48   | 0.002         |                     | Rice Suit.   | -0.05  | -3.04   | 0.006   |
|                         | Causation            | Female       | -0.12  | -58.56  | < 0.001       | Humans                  | Female       | 0.11   | 55.50   | < 0.001       | Achievement         | Female       | -0.21  | -109.02 | < 0.001 |
|                         |                      | GDP          | 0.03   | 0.57    | 0.572         |                         | GDP          | 0.004  | 0.07    | 0.945         |                     | GDP          | 0.01   | 0.28    | 0.779   |
|                         |                      | % Urban      | -0.05  | -0.95   | 0.355         |                         | % Urban      | -0.07  | -1.24   | 0.229         |                     | % Urban      | -0.03  | -0.48   | 0.636   |
|                         |                      | % Herding    | 0.01   | 1.39    | 0.177         |                         | % Herding    | 0.03   | 2.15    | 0.042         |                     | % Herding    | 0.01   | 1.36    | 0.184   |
|                         |                      | % Cult. Land | 0.02   | 1.16    | 0.260         |                         | % Cult. Land | 0.01   | 0.51    | 0.613         |                     | % Cult. Land | 0.02   | 1.18    | 0.249   |
|                         |                      | Rice Suit.   | -0.05  | -3.31   | 0.003         |                         | Rice Suit.   | -0.05  | -2.70   | 0.013         |                     | Rice Suit.   | -0.05  | -3.22   | 0.004   |
|                         | Certainty            | Female       | 0.09   | 45.00   | < 0.001       | In/Outgroup: Connecting | Female       | 0.0002 | 0.11    | 0.912         | Fashion and Trends  | Female       | 0.04   | 15.57   | < 0.001 |
|                         |                      | GDP          | -0.01  | -0.15   | 0.885         |                         | GDP          | 0.02   | 0.55    | 0.591         |                     | GDP          | -0.01  | -0.43   | 0.674   |
|                         |                      | % Urban      | -0.04  | -1.11   | 0.281         |                         | % Urban      | -0.06  | -2.09   | 0.050         |                     | % Urban      | 0.02   | 0.78    | 0.441   |
|                         |                      | % Herding    | 0.01   | 1.21    | 0.235         |                         | % Herding    | 0.02   | 2.63    | 0.014         |                     | % Herding    | 0.001  | 0.10    | 0.921   |
|                         |                      | % Cult. Land | -0.001 | -0.08   | 0.936         |                         | % Cult. Land | -0.01  | -1.26   | 0.221         |                     | % Cult. Land | 0.003  | 0.28    | 0.779   |
|                         |                      | Rice Suit.   | -0.04  | -3.38   | 0.003         |                         | Rice Suit.   | -0.02  | -1.74   | 0.096         |                     | Rice Suit.   | -0.004 | -0.46   | 0.652   |
|                         | Possibility/Openness | Female       | 0.08   | 37.81   | < 0.001       | In/Outgroup: Dividing   | Female       | -0.01  | -2.93   | 0.003         | Affect              | Female       | 0.26   | 137.08  | < 0.001 |
|                         |                      | GDP          | 0.03   | 0.69    | 0.500         |                         | GDP          | -0.09  | -1.82   | 0.082         |                     | GDP          | -0.02  | -0.47   | 0.641   |
| % Urban                 |                      | -0.06        | -1.58  | 0.128   | % Urban       |                         | 0.12         | 2.25   | 0.036   | % Urban       |                     | -0.05        | -1.13  | 0.269   |         |
| % Herding               |                      | 0.005        | 0.55   | 0.590   | % Herding     |                         | -0.004       | -0.39  | 0.700   | % Herding     |                     | 0.02         | 1.81   | 0.082   |         |
| % Cult. Land            |                      | -0.003       | -0.21  | 0.834   | % Cult. Land  |                         | -0.003       | -0.18  | 0.863   | % Cult. Land  |                     | -0.02        | -1.53  | 0.139   |         |
| Rice Suit.              |                      | -0.03        | -2.37  | 0.026   | Rice Suit.    |                         | -0.001       | -0.07  | 0.945   | Rice Suit.    |                     | -0.01        | -0.53  | 0.601   |         |
| Assent                  | Female               | 0.18         | 93.53  | < 0.001 | Self          | Female                  | -0.05        | -17.62 | < 0.001 | Non-Fluencies | Female              | 0.18         | 90.24  | < 0.001 |         |
|                         | GDP                  | -0.01        | -0.19  | 0.853   |               | GDP                     | -0.003       | -0.11  | 0.917   |               | GDP                 | -0.02        | -0.43  | 0.670   |         |
|                         | % Urban              | 0.02         | 0.33   | 0.744   |               | % Urban                 | 0.01         | 0.40   | 0.694   |               | % Urban             | 0.03         | 0.54   | 0.592   |         |
|                         | % Herding            | -0.01        | -0.91  | 0.373   |               | % Herding               | -0.01        | -1.02  | 0.317   |               | % Herding           | -0.004       | -0.42  | 0.678   |         |
|                         | % Cult. Land         | -0.03        | -1.55  | 0.136   |               | % Cult. Land            | -0.01        | -1.13  | 0.270   |               | % Cult. Land        | -0.02        | -1.25  | 0.226   |         |
|                         | Rice Suit.           | 0.07         | 3.97   | < 0.001 |               | Rice Suit.              | -0.01        | -1.06  | 0.298   |               | Rice Suit.          | 0.05         | 3.09   | 0.005   |         |

Note: Analyses are hierarchical linear models nested in provinces. Rice suitability is an instrumental variable that reduces the potential for reverse causality. Suitability is an index of environmental variables (such as rainfall) that determine where it is physically possible to grow paddy rice, regardless of whether people are farming rice there. We indexed herding using the percentage of traditionally herding ethnicities in each province, according to the 2000 Census. For example, Mongolian and Manchu ethnicities herded traditionally. The supplemental materials present the full list of herding groups. Provincial GDP per capita statistics are from 2012 in RMB. The analyses in the main text use 2014 GDP at the request of a reviewer, but 2012 and 2014 prefecture GDP correlate  $r = 0.98$ , so the difference is negligible.

**Table S8A**

*Rice-Wheat Differences Robust to Provinces' Climatic Demands*

| Word Category           |                      | $\beta$      | $t$    | $P$     | Word Category |                         | $\beta$      | $t$    | $P$     | Word Category |                     | $\beta$      | $t$    | $P$     |         |
|-------------------------|----------------------|--------------|--------|---------|---------------|-------------------------|--------------|--------|---------|---------------|---------------------|--------------|--------|---------|---------|
| Cognition and Discourse | Cognitive Processes  | Female       | 0.08   | 40.97   | < 0.001       | Universalism            | Female       | -0.08  | -36.85  | < 0.001       | Positivity/Optimism | Female       | 0.001  | 0.66    | 0.507   |
|                         |                      | GDP          | 0.02   | 0.58    | 0.571         |                         | GDP          | -0.02  | -0.56   | 0.579         |                     | GDP          | -0.004 | -0.08   | 0.939   |
|                         |                      | % Urban      | -0.06  | -1.38   | 0.184         |                         | % Urban      | 0.02   | 0.55    | 0.589         |                     | % Urban      | -0.03  | -0.58   | 0.567   |
|                         |                      | % Herding    | 0.001  | 0.12    | 0.905         |                         | % Herding    | 0.02   | 1.90    | 0.069         |                     | % Herding    | 0.01   | 0.66    | 0.516   |
|                         |                      | % Cult. Land | -0.01  | -0.95   | 0.356         |                         | % Cult. Land | -0.01  | -0.82   | 0.424         |                     | % Cult. Land | -0.01  | -0.67   | 0.511   |
|                         |                      | Clim. Dem.   | 0.02   | 1.68    | 0.106         |                         | Clim. Dem.   | 0.003  | 0.29    | 0.771         |                     | Clim. Dem.   | 0.01   | 0.34    | 0.734   |
|                         |                      | Rice %       | -0.06  | -3.27   | 0.004         |                         | Rice %       | -0.05  | -3.28   | 0.004         |                     | Rice %       | -0.07  | -3.46   | 0.002   |
|                         | Causation            | Female       | -0.12  | -58.56  | < 0.001       | Humans                  | Female       | 0.11   | 55.50   | < 0.001       | Achievement         | Female       | -0.12  | -58.56  | < 0.001 |
|                         |                      | GDP          | 0.02   | 0.48    | 0.635         |                         | GDP          | -0.001 | -0.03   | 0.977         |                     | GDP          | 0.02   | 0.48    | 0.635   |
|                         |                      | % Urban      | -0.02  | -0.40   | 0.690         |                         | % Urban      | -0.05  | -0.85   | 0.402         |                     | % Urban      | -0.02  | -0.40   | 0.690   |
|                         |                      | % Herding    | 0.01   | 0.72    | 0.476         |                         | % Herding    | 0.01   | 1.12    | 0.273         |                     | % Herding    | 0.01   | 0.72    | 0.476   |
|                         |                      | % Cult. Land | -0.001 | -0.03   | 0.974         |                         | % Cult. Land | -0.01  | -0.74   | 0.465         |                     | % Cult. Land | -0.001 | -0.03   | 0.974   |
|                         |                      | Clim. Dem.   | 0.01   | 0.91    | 0.373         |                         | Clim. Dem.   | 0.02   | 1.36    | 0.187         |                     | Clim. Dem.   | 0.01   | 0.91    | 0.373   |
|                         |                      | Rice %       | -0.06  | -3.28   | 0.004         |                         | Rice %       | -0.06  | -2.85   | 0.009         |                     | Rice %       | -0.06  | -3.28   | 0.004   |
|                         | Certainty            | Female       | -0.12  | -58.56  | < 0.001       | In/Outgroup: Connecting | Female       | 0.0003 | 0.12    | 0.904         | Fashion and Trends  | Female       | 0.04   | 15.57   | < 0.001 |
|                         |                      | GDP          | 0.02   | 0.48    | 0.635         |                         | GDP          | 0.01   | 0.39    | 0.698         |                     | GDP          | -0.01  | -0.26   | 0.800   |
|                         |                      | % Urban      | -0.02  | -0.40   | 0.690         |                         | % Urban      | -0.05  | -1.63   | 0.121         |                     | % Urban      | 0.02   | 0.52    | 0.606   |
|                         |                      | % Herding    | 0.01   | 0.72    | 0.476         |                         | % Herding    | 0.02   | 2.48    | 0.020         |                     | % Herding    | 0.004  | 0.53    | 0.599   |
|                         |                      | % Cult. Land | -0.001 | -0.03   | 0.974         |                         | % Cult. Land | -0.02  | -1.56   | 0.137         |                     | % Cult. Land | 0.01   | 0.53    | 0.601   |
|                         |                      | Clim. Dem.   | 0.01   | 0.91    | 0.373         |                         | Clim. Dem.   | -0.004 | -0.36   | 0.726         |                     | Clim. Dem.   | 0.001  | 0.14    | 0.889   |
|                         |                      | Rice %       | -0.06  | -3.28   | 0.004         |                         | Rice %       | -0.02  | -1.90   | 0.074         |                     | Rice %       | 0.01   | 0.62    | 0.543   |
|                         | Possibility/Openness | Female       | 0.08   | 37.81   | < 0.001       | In/Outgroup: Dividing   | Female       | -0.01  | -2.91   | 0.004         | Affect              | Female       | 0.26   | 137.08  | < 0.001 |
|                         |                      | GDP          | 0.02   | 0.68    | 0.501         |                         | GDP          | -0.10  | -2.16   | 0.042         |                     | GDP          | -0.02  | -0.42   | 0.681   |
|                         |                      | % Urban      | -0.05  | -1.28   | 0.215         |                         | % Urban      | 0.13   | 2.65    | 0.016         |                     | % Urban      | -0.05  | -1.09   | 0.290   |
| % Herding               |                      | -0.002       | -0.26  | 0.794   | % Herding     |                         | 0.01         | 1.11   | 0.273   | % Herding     |                     | 0.01         | 1.00   | 0.327   |         |
| % Cult. Land            |                      | -0.03        | -1.84  | 0.080   | % Cult. Land  |                         | 0.01         | 0.56   | 0.579   | % Cult. Land  |                     | -0.03        | -1.84  | 0.080   |         |
| Clim. Dem.              |                      | 0.01         | 1.12   | 0.274   | Clim. Dem.    |                         | -0.04        | -2.54  | 0.016   | Clim. Dem.    |                     | 0.01         | 0.90   | 0.379   |         |
| Rice %                  |                      | -0.03        | -2.24  | 0.037   | Rice %        |                         | -0.02        | -1.07  | 0.299   | Rice %        |                     | -0.01        | -0.32  | 0.755   |         |
| Assent                  | Female               | 0.18         | 93.52  | < 0.001 | Self          | Female                  | -0.05        | -17.60 | < 0.001 | Non-Fluencies | Female              | 0.18         | 90.23  | < 0.001 |         |
|                         | GDP                  | -0.001       | -0.03  | 0.977   |               | GDP                     | -0.01        | -0.26  | 0.798   |               | GDP                 | -0.01        | -0.28  | 0.784   |         |
|                         | % Urban              | -0.02        | -0.32  | 0.752   |               | % Urban                 | 0.03         | 0.69   | 0.499   |               | % Urban             | -0.001       | -0.01  | 0.989   |         |
|                         | % Herding            | -0.01        | -0.50  | 0.618   |               | % Herding               | -0.003       | -0.39  | 0.698   |               | % Herding           | -0.002       | -0.16  | 0.878   |         |
|                         | % Cult. Land         | -0.01        | -0.34  | 0.734   |               | % Cult. Land            | -0.01        | -1.08  | 0.292   |               | % Cult. Land        | -0.01        | -0.28  | 0.780   |         |
|                         | Clim. Dem.           | -0.01        | -0.60  | 0.555   |               | Clim. Dem.              | -0.01        | -0.83  | 0.412   |               | Clim. Dem.          | -0.01        | -0.34  | 0.733   |         |
|                         | Rice %               | 0.08         | 3.50   | 0.002   |               | Rice %                  | -0.02        | -1.34  | 0.196   |               | Rice %              | 0.06         | 2.84   | 0.010   |         |

Note: Analyses are hierarchical linear models nested in provinces. Provincial GDP per capita statistics are from 2012 in RMB. The analyses in the main text use 2014 GDP at the request of a reviewer, but 2012 and 2014 GDP correlate  $r = 0.99$ , so the difference is negligible. Climatic demands are calculated as the sum deviation from 22C in the average highs and lows of July and January. Climatic demands theory argues that cultures in harsher climates should be more collectivistic.

**Table S8B***Rice-Wheat Differences Robust to Prefectures' Climatic Demands*

| Word Category           |                      | $\beta$    | $t$   | $P$    | Word Category |                         | $\beta$    | $t$     | $P$    | Word Category |                       | $\beta$    | $t$   | $P$    |         |
|-------------------------|----------------------|------------|-------|--------|---------------|-------------------------|------------|---------|--------|---------------|-----------------------|------------|-------|--------|---------|
| Cognition and Discourse | Cognitive Processes  | Female     | 0.08  | 24.19  | < 0.001       | Universalism            | Female     | -0.09   | -23.20 | < 0.001       | Positivity/Optimism   | Female     | -0.01 | -1.68  | 0.092   |
|                         |                      | GDP        | -0.03 | -4.86  | < 0.001       |                         | GDP        | 0.002   | 0.46   | 0.644         |                       | GDP        | -0.04 | -5.17  | < 0.001 |
|                         |                      | Clim. Dem. | 0.005 | 0.58   | 0.562         |                         | Clim. Dem. | 0.01    | 1.40   | 0.165         |                       | Clim. Dem. | -0.01 | -1.14  | 0.256   |
|                         |                      | Rice %     | -0.08 | -8.18  | < 0.001       |                         | Rice %     | -0.04   | -5.31  | < 0.001       |                       | Rice %     | -0.08 | -8.39  | < 0.001 |
|                         | Causation            | Female     | -0.13 | -37.53 | < 0.001       | Humans                  | Female     | 0.12    | 33.91  | < 0.001       | Achievement           | Female     | -0.23 | -67.34 | < 0.001 |
|                         |                      | GDP        | 0.01  | 1.45   | 0.150         |                         | GDP        | -0.05   | -6.50  | < 0.001       |                       | GDP        | 0.01  | 2.23   | 0.027   |
|                         |                      | Clim. Dem. | 0.01  | 1.94   | 0.054         |                         | Clim. Dem. | 0.02    | 2.82   | 0.005         |                       | Clim. Dem. | 0.01  | 1.93   | 0.054   |
|                         |                      | Rice %     | -0.07 | -8.10  | < 0.001       |                         | Rice %     | -0.07   | -6.26  | < 0.001       |                       | Rice %     | -0.06 | -6.90  | < 0.001 |
|                         | Certainty            | Female     | 0.10  | 27.62  | < 0.001       | In/Outgroup: Connecting | Female     | -0.0004 | -0.11  | 0.910         | Fashion and Trends    | Female     | 0.02  | 3.91   | < 0.001 |
|                         |                      | GDP        | -0.04 | -5.64  | < 0.001       |                         | GDP        | -0.04   | -8.11  | < 0.001       |                       | GDP        | 0.02  | 2.87   | 0.005   |
|                         |                      | Clim. Dem. | 0.01  | 0.94   | 0.350         |                         | Clim. Dem. | 0.003   | 0.46   | 0.643         |                       | Clim. Dem. | 0.003 | 0.47   | 0.636   |
|                         |                      | Rice %     | -0.06 | -7.09  | < 0.001       |                         | Rice %     | -0.03   | -4.42  | < 0.001       |                       | Rice %     | 0.01  | 1.54   | 0.125   |
|                         | Possibility/Openness | Female     | 0.08  | 22.94  | < 0.001       | In/Outgroup: Dividing   | Female     | -0.03   | -3.36  | < 0.001       | Affect                | Female     | 0.28  | 82.17  | < 0.001 |
|                         |                      | GDP        | -0.03 | -4.60  | < 0.001       |                         | GDP        | 0.02    | 1.35   | 0.180         |                       | GDP        | -0.06 | -8.43  | < 0.001 |
|                         |                      | Clim. Dem. | -0.01 | -1.59  | 0.114         |                         | Clim. Dem. | -0.04   | -2.77  | 0.006         |                       | Clim. Dem. | -0.01 | -1.42  | 0.155   |
|                         |                      | Rice %     | -0.05 | -6.19  | < 0.001       |                         | Rice %     | -0.03   | -2.00  | 0.048         |                       | Rice %     | -0.03 | -2.93  | 0.004   |
|                         | Assent               | Female     | 0.21  | 59.94  | < 0.001       | Self                    | Female     | -0.05   | -10.48 | < 0.001       | C. & D. Non-Fluencies | Female     | 0.20  | 57.56  | < 0.001 |
|                         |                      | GDP        | -0.01 | -2.11  | 0.036         |                         | GDP        | 0.01    | 2.09   | 0.038         |                       | GDP        | -0.01 | -2.25  | 0.026   |
|                         |                      | Clim. Dem. | -0.03 | -3.62  | < 0.001       |                         | Clim. Dem. | -0.02   | -2.34  | 0.020         |                       | Clim. Dem. | -0.01 | -2.07  | 0.039   |
|                         |                      | Rice %     | 0.05  | 5.55   | < 0.001       |                         | Rice %     | -0.02   | -2.37  | 0.019         |                       | Rice %     | 0.04  | 4.47   | < 0.001 |

Note: Analyses are hierarchical linear models nested in prefectures. Climatic demands are calculated as the sum deviation from 22C in the average highs and lows of July and January. Climatic demands theory argues that cultures in harsher climates should be more collectivistic. The analyses in the main text use 2014 GDP at the request of a reviewer, but 2012 and 2014 prefecture GDP correlate  $r = 0.98$ , so the difference is negligible.

**Table S9**

*Provincial Rice-Wheat Differences Are Robust to Climatic Demands Combined with GDP*

| Word Category           |                      | $\beta$      | $t$     | $P$     | Word Category |                         | $\beta$      | $t$    | $P$     | Word Category    |                     | $\beta$      | $t$    | $P$     |         |
|-------------------------|----------------------|--------------|---------|---------|---------------|-------------------------|--------------|--------|---------|------------------|---------------------|--------------|--------|---------|---------|
| Cognition and Discourse | Cognitive Processes  | Female       | 0.08    | 40.97   | < 0.001       | Universalism            | Female       | -0.08  | -36.84  | < 0.001          | Positivity/Optimism | Female       | 0.001  | 0.67    | 0.505   |
|                         |                      | GDP          | -0.01   | -0.12   | 0.906         |                         | GDP          | 0.08   | 1.13    | 0.272            |                     | GDP          | 0.06   | 0.61    | 0.547   |
|                         |                      | % Urban      | -0.06   | -1.21   | 0.242         |                         | % Urban      | 0.007  | 0.20    | 0.841            |                     | % Urban      | -0.04  | -0.73   | 0.473   |
|                         |                      | % Herding    | 0.001   | 0.14    | 0.890         |                         | % Herding    | 0.02   | 1.92    | 0.066            |                     | % Herding    | 0.01   | 0.62    | 0.543   |
|                         |                      | % Cult. Land | -0.01   | -0.79   | 0.437         |                         | % Cult. Land | -0.02  | -1.19   | 0.248            |                     | % Cult. Land | -0.02  | -0.82   | 0.422   |
|                         |                      | Clim. Dem.   | 0.01    | 0.36    | 0.721         |                         | Clim. Dem.   | 0.04   | 1.55    | 0.134            |                     | Clim. Dem.   | 0.03   | 0.81    | 0.426   |
|                         |                      | Clim. x GDP  | 0.03    | 0.44    | 0.666         |                         | Clim. x GDP  | -0.10  | -1.59   | 0.125            |                     | Clim. x GDP  | -0.07  | -0.74   | 0.469   |
|                         |                      | Rice %       | -0.05   | -2.84   | 0.010         |                         | Rice %       | -0.05  | -3.74   | 0.001            |                     | Rice %       | -0.08  | -3.49   | 0.002   |
|                         | Causation            | Female       | -0.12   | -58.55  | < 0.001       | Humans                  | Female       | 0.11   | 55.50   | < 0.001          | Achievement         | Female       | -0.21  | -109.01 | < 0.001 |
|                         |                      | GDP          | 0.08    | 0.96    | 0.348         |                         | GDP          | 0.07   | 0.66    | 0.516            |                     | GDP          | 0.14   | 1.42    | 0.171   |
|                         |                      | % Urban      | -0.03   | -0.58   | 0.566         |                         | % Urban      | -0.06  | -1.00   | 0.327            |                     | % Urban      | -0.01  | -0.26   | 0.795   |
|                         |                      | % Herding    | 0.01    | 0.68    | 0.501         |                         | % Herding    | 0.01   | 1.07    | 0.294            |                     | % Herding    | 0.01   | 0.86    | 0.398   |
|                         |                      | % Cult. Land | -0.004  | -0.23   | 0.821         |                         | % Cult. Land | -0.02  | -0.90   | 0.378            |                     | % Cult. Land | -0.004 | -0.21   | 0.833   |
|                         |                      | Clim. Dem.   | 0.04    | 1.16    | 0.260         |                         | Clim. Dem.   | 0.05   | 1.30    | 0.207            |                     | Clim. Dem.   | 0.05   | 1.60    | 0.124   |
|                         |                      | Clim. x GDP  | -0.07   | -0.83   | 0.414         |                         | Clim. x GDP  | -0.07  | -0.77   | 0.452            |                     | Clim. x GDP  | -0.14  | -1.53   | 0.139   |
|                         |                      | Rice %       | -0.07   | -3.36   | 0.003         |                         | Rice %       | -0.07  | -2.93   | 0.008            |                     | Rice %       | -0.07  | -3.46   | 0.002   |
|                         | Certainty            | Female       | 0.09    | 44.99   | < 0.001       | In/Outgroup: Connecting | Female       | 0.0003 | 0.13    | 0.895            | Fashion and Trends  | Female       | 0.04   | 15.57   | < 0.001 |
|                         |                      | GDP          | -0.01   | -0.22   | 0.832         |                         | GDP          | 0.09   | 1.59    | 0.127            |                     | GDP          | 0.03   | 0.53    | 0.602   |
|                         |                      | % Urban      | -0.03   | -0.72   | 0.478         |                         | % Urban      | -0.06  | -2.01   | 0.060            |                     | % Urban      | 0.01   | 0.35    | 0.732   |
|                         |                      | % Herding    | 0.0001  | 0.01    | 0.994         |                         | % Herding    | 0.02   | 2.53    | 0.019            |                     | % Herding    | 0.004  | 0.52    | 0.605   |
|                         |                      | % Cult. Land | -0.02   | -1.61   | 0.124         |                         | % Cult. Land | -0.02  | -1.94   | 0.069            |                     | % Cult. Land | 0.004  | 0.33    | 0.743   |
|                         |                      | Clim. Dem.   | 0.02    | 0.76    | 0.458         |                         | Clim. Dem.   | 0.03   | 1.23    | 0.232            |                     | Clim. Dem.   | 0.02   | 0.72    | 0.478   |
|                         |                      | Clim. x GDP  | 0.01    | 0.14    | 0.890         |                         | Clim. x GDP  | -0.09  | -1.58   | 0.129            |                     | Clim. x GDP  | -0.04  | -0.74   | 0.468   |
|                         |                      | Rice %       | -0.05   | -3.11   | 0.006         |                         | Rice %       | -0.03  | -2.43   | 0.026            |                     | Rice %       | 0.004  | 0.29    | 0.777   |
|                         | Possibility/Openness | Female       | 0.08    | 37.81   | < 0.001       | In/Outgroup: Dividing   | Female       | -0.01  | -2.89   | 0.004            | Affect              | Female       | 0.26   | 137.07  | < 0.001 |
|                         |                      | GDP          | -0.0004 | -0.01   | 0.996         |                         | GDP          | -0.003 | -0.03   | 0.973            |                     | GDP          | -0.08  | -0.91   | 0.371   |
|                         |                      | % Urban      | -0.05   | -1.13   | 0.272         |                         | % Urban      | 0.12   | 2.39    | 0.028            |                     | % Urban      | -0.04  | -0.86   | 0.402   |
|                         |                      | % Herding    | -0.002  | -0.24   | 0.813         |                         | % Herding    | 0.01   | 1.12    | 0.270            |                     | % Herding    | 0.01   | 1.02    | 0.316   |
| % Cult. Land            |                      | -0.02        | -1.08   | 0.292   | % Cult. Land  |                         | 0.005        | 0.28   | 0.780   | % Cult. Land     |                     | -0.03        | -1.57  | 0.131   |         |
| Clim. Dem.              |                      | 0.005        | 0.18    | 0.862   | Clim. Dem.    |                         | -0.01        | -0.20  | 0.841   | Clim. Dem.       |                     | -0.01        | -0.32  | 0.751   |         |
| Clim. x GDP             |                      | 0.03         | 0.36    | 0.719   | Clim. x GDP   |                         | -0.10        | -1.12  | 0.272   | Clim. x GDP      |                     | 0.06         | 0.82   | 0.423   |         |
| Rice %                  |                      | -0.03        | -1.91   | 0.071   | Rice %        |                         | -0.03        | -1.46  | 0.161   | Rice %           |                     | -0.0001      | -0.01  | 0.994   |         |
| Assent                  | Female               | 0.18         | 93.52   | < 0.001 | Self          | Female                  | -0.05        | -17.59 | < 0.001 | Cog. & Discourse | Non-Fluencies       | Female       | 0.18   | 90.22   | < 0.001 |
|                         | GDP                  | -0.15        | -1.55   | 0.137   |               | GDP                     | 0.11         | 1.65   | 0.114   |                  |                     | GDP          | -0.16  | -1.76   | 0.094   |
|                         | % Urban              | 0.004        | 0.08    | 0.935   |               | % Urban                 | 0.01         | 0.28   | 0.779   |                  |                     | % Urban      | 0.02   | 0.40    | 0.695   |
|                         | % Herding            | -0.01        | -0.44   | 0.666   |               | % Herding               | -0.004       | -0.46  | 0.649   |                  |                     | % Herding    | -0.001 | -0.08   | 0.936   |
|                         | % Cult. Land         | 0.001        | 0.05    | 0.960   |               | % Cult. Land            | -0.02        | -1.62  | 0.123   |                  |                     | % Cult. Land | 0.003  | 0.15    | 0.886   |
|                         | Clim. Dem.           | -0.06        | -1.83   | 0.081   |               | Clim. Dem.              | 0.03         | 1.38   | 0.181   |                  |                     | Clim. Dem.   | -0.06  | -1.80   | 0.085   |
|                         | Clim. x GDP          | 0.16         | 1.74    | 0.096   |               | Clim. x GDP             | -0.12        | -2.01  | 0.056   |                  |                     | Clim. x GDP  | 0.16   | 1.84    | 0.080   |
|                         | Rice %               | 0.09         | 4.03    | < 0.001 |               | Rice %                  | -0.03        | -2.10  | 0.049   |                  |                     | Rice %       | 0.07   | 3.47    | 0.002   |

**Table S10***Differences Between Rice and Wheat Prefectures Are Robust to Climatic Demands Combined with GDP*

| Word Category           |                      | $\beta$     | $t$     | $P$     | Word Category |                         | $\beta$     | $t$     | $P$     | Word Category |                     | $\beta$     | $t$    | $P$     |         |
|-------------------------|----------------------|-------------|---------|---------|---------------|-------------------------|-------------|---------|---------|---------------|---------------------|-------------|--------|---------|---------|
| Cognition and Discourse | Cognitive Processes  | Female      | 0.08    | 24.19   | < 0.001       | Universalism            | Female      | -0.09   | -23.19  | < 0.001       | Positivity/Optimism | Female      | -0.01  | -1.68   | 0.092   |
|                         |                      | GDP         | -0.01   | -0.63   | 0.530         |                         | GDP         | 0.04    | 2.75    | 0.007         |                     | GDP         | -0.01  | -0.58   | 0.565   |
|                         |                      | Clim. Dem.  | 0.01    | 1.07    | 0.287         |                         | Clim. Dem.  | 0.03    | 3.01    | 0.003         |                     | Clim. Dem.  | 0.001  | 0.10    | 0.924   |
|                         |                      | Clim. x GDP | -0.02   | -0.90   | 0.367         |                         | Clim. x GDP | -0.05   | -2.70   | 0.008         |                     | Clim. x GDP | -0.02  | -1.06   | 0.288   |
|                         |                      | Rice %      | -0.08   | -8.20   | < 0.001       |                         | Rice %      | -0.04   | -5.83   | < 0.001       |                     | Rice %      | -0.08  | -8.46   | < 0.001 |
|                         | Causation            | Female      | -0.13   | -37.53  | < 0.001       | Humans                  | Female      | 0.12    | 33.91   | < 0.001       | Achievement         | Female      | -0.23  | -67.34  | < 0.001 |
|                         |                      | GDP         | 0.03    | 1.49    | 0.139         |                         | GDP         | -0.003  | -0.11   | 0.912         |                     | GDP         | 0.05   | 2.53    | 0.012   |
|                         |                      | Clim. Dem.  | 0.02    | 2.06    | 0.039         |                         | Clim. Dem.  | 0.04    | 3.34    | < 0.001       |                     | Clim. Dem.  | 0.03   | 2.71    | 0.007   |
|                         |                      | Clim. x GDP | -0.02   | -1.09   | 0.278         |                         | Clim. x GDP | -0.05   | -1.98   | 0.048         |                     | Clim. x GDP | -0.04  | -1.92   | 0.056   |
|                         |                      | Rice %      | -0.07   | -8.18   | < 0.001       |                         | Rice %      | -0.07   | -6.62   | < 0.001       |                     | Rice %      | -0.06  | -7.23   | < 0.001 |
|                         | Certainty            | Female      | 0.10    | 27.62   | < 0.001       | In/Outgroup: Connecting | Female      | -0.0004 | -0.11   | 0.909         | Fashion and Trends  | Female      | 0.02   | 3.90    | < 0.001 |
|                         |                      | GDP         | -0.01   | -0.37   | 0.710         |                         | GDP         | -0.05   | -2.76   | 0.007         |                     | GDP         | 0.01   | 0.35    | 0.724   |
|                         |                      | Clim. Dem.  | 0.02    | 1.72    | 0.087         |                         | Clim. Dem.  | 0.001   | 0.11    | 0.915         |                     | Clim. Dem.  | -0.003 | -0.22   | 0.826   |
|                         |                      | Clim. x GDP | -0.03   | -1.46   | 0.147         |                         | Clim. x GDP | 0.004   | 0.22    | 0.828         |                     | Clim. x GDP | 0.01   | 0.60    | 0.551   |
|                         |                      | Rice %      | -0.07   | -7.32   | < 0.001       |                         | Rice %      | -0.03   | -4.27   | < 0.001       |                     | Rice %      | 0.01   | 1.62    | 0.108   |
|                         | Possibility/Openness | Female      | 0.08    | 22.95   | < 0.001       | In/Outgroup: Dividing   | Female      | -0.03   | -3.36   | < 0.001       | Affect              | Female      | 0.28   | 82.17   | < 0.001 |
|                         |                      | GDP         | -0.01   | -0.29   | 0.774         |                         | GDP         | 0.01    | 0.39    | 0.694         |                     | GDP         | -0.10  | -4.11   | < 0.001 |
|                         |                      | Clim. Dem.  | -0.0003 | -0.03   | 0.978         |                         | Clim. Dem.  | -0.04   | -1.60   | 0.111         |                     | Clim. Dem.  | -0.03  | -2.17   | 0.031   |
|                         |                      | Clim. x GDP | -0.02   | -1.22   | 0.225         |                         | Clim. x GDP | 0.002   | 0.04    | 0.970         |                     | Clim. x GDP | 0.04   | 1.65    | 0.100   |
|                         |                      | Rice %      | -0.05   | -6.37   | < 0.001       |                         | Rice %      | -0.03   | -1.96   | 0.054         |                     | Rice %      | -0.03  | -2.46   | 0.015   |
| Assent                  | Female               | 0.21        | 59.94   | < 0.001 | Self          | Female                  | -0.05       | -10.46  | < 0.001 | Non-Fluencies | Female              | 0.20        | 57.56  | < 0.001 |         |
|                         | GDP                  | -0.05       | -2.36   | 0.019   |               | GDP                     | 0.07        | 3.29    | 0.001   |               | GDP                 | -0.02       | -1.28  | 0.203   |         |
|                         | Clim. Dem.           | -0.04       | -3.69   | < 0.001 |               | Clim. Dem.              | 0.01        | 0.85    | 0.396   |               | Clim. Dem.          | -0.02       | -1.76  | 0.078   |         |
|                         | Clim. x GDP          | 0.04        | 1.80    | 0.073   |               | Clim. x GDP             | -0.06       | -2.76   | 0.006   |               | Clim. x GDP         | 0.01        | 0.61   | 0.542   |         |
|                         | Rice %               | 0.05        | 5.82    | < 0.001 |               | Rice %                  | -0.03       | -2.87   | 0.005   |               | Rice %              | 0.04        | 4.51   | < 0.001 |         |

Note: Analyses are hierarchical linear models nested in prefectures. Climatic demands are calculated as the sum deviation from 22C in the average highs and lows of July and January. Climatic demands theory argues that cultures in harsher climates should be more collectivistic. A further version of this theory is that climatic demands have a weaker influence on culture in more developed areas because people use resources to buffer against the climate. The analyses in the main text use 2014 GDP at the request of a reviewer, but 2012 and 2014 prefecture GDP correlate  $r = 0.98$ , so the difference is negligible.

**Table S11**

*Alternative Measures of Modernization: Service Sector*

| Word Category           |                      | $\beta$      | $t$      | $P$     | Word Category |                         | $\beta$      | $t$    | $P$     | Word Category             |                     | $\beta$      | $t$    | $P$     |         |
|-------------------------|----------------------|--------------|----------|---------|---------------|-------------------------|--------------|--------|---------|---------------------------|---------------------|--------------|--------|---------|---------|
| Cognition and Discourse | Cognitive Processes  | Female       | 0.08     | 40.98   | < 0.001       | Universalism            | Female       | -0.08  | -36.86  | < 0.001                   | Positivity/Optimism | Female       | 0.001  | 0.66    | 0.509   |
|                         |                      | Service Ind. | -0.06    | -2.19   | 0.040         |                         | Service Ind. | 0.01   | 0.42    | 0.678                     |                     | Service Ind. | -0.05  | -1.47   | 0.156   |
|                         |                      | % Urban      | 0.01     | 0.31    | 0.756         |                         | % Urban      | -0.01  | -0.28   | 0.780                     |                     | % Urban      | -0.002 | -0.07   | 0.948   |
|                         |                      | % Herding    | 0.01     | 1.30    | 0.205         |                         | % Herding    | 0.02   | 2.37    | 0.025                     |                     | % Herding    | 0.01   | 1.00    | 0.327   |
|                         |                      | % Cult. Land | -0.02    | -1.19   | 0.247         |                         | % Cult. Land | -0.01  | -0.76   | 0.456                     |                     | % Cult. Land | -0.02  | -1.07   | 0.295   |
|                         |                      | Rice %       | -0.08    | -5.35   | < 0.001       |                         | Rice %       | -0.05  | -3.71   | 0.001                     |                     | Rice %       | -0.08  | -4.68   | < 0.001 |
|                         | Causation            | Female       | -0.12    | -58.56  | < 0.001       | Humans                  | Female       | 0.11   | 55.50   | < 0.001                   | Achievement         | Female       | -0.21  | -109.01 | < 0.001 |
|                         |                      | Service Ind. | -0.02    | -0.77   | 0.448         |                         | Service Ind. | -0.05  | -1.66   | 0.112                     |                     | Service Ind. | -0.01  | -0.39   | 0.700   |
|                         |                      | % Urban      | 0.02     | 0.79    | 0.438         |                         | % Urban      | -0.01  | -0.22   | 0.824                     |                     | % Urban      | 0.02   | 0.77    | 0.452   |
|                         |                      | % Herding    | 0.01     | 1.54    | 0.137         |                         | % Herding    | 0.02   | 2.17    | 0.040                     |                     | % Herding    | 0.01   | 1.43    | 0.164   |
|                         |                      | % Cult. Land | -0.00004 | -0.002  | 0.998         |                         | % Cult. Land | -0.02  | -1.01   | 0.324                     |                     | % Cult. Land | 0.003  | 0.15    | 0.884   |
|                         |                      | Rice %       | -0.07    | -4.49   | < 0.001       |                         | Rice %       | -0.08  | -4.46   | < 0.001                   |                     | Rice %       | -0.07  | -3.87   | < 0.001 |
|                         | Certainty            | Female       | 0.09     | 45.01   | < 0.001       | In/Outgroup: Connecting | Female       | 0.0003 | 0.12    | 0.905                     | Fashion and Trends  | Female       | 0.04   | 15.57   | < 0.001 |
|                         |                      | Service Ind. | -0.03    | -1.23   | 0.234         |                         | Service Ind. | 0.003  | 0.18    | 0.863                     |                     | Service Ind. | 0.01   | 0.59    | 0.559   |
|                         |                      | % Urban      | -0.01    | -0.55   | 0.589         |                         | % Urban      | -0.04  | -2.46   | 0.022                     |                     | % Urban      | 0.001  | 0.04    | 0.969   |
|                         |                      | % Herding    | 0.01     | 1.06    | 0.298         |                         | % Herding    | 0.02   | 2.90    | 0.007                     |                     | % Herding    | 0.004  | 0.68    | 0.501   |
|                         |                      | % Cult. Land | -0.02    | -1.72   | 0.101         |                         | % Cult. Land | -0.02  | -1.50   | 0.150                     |                     | % Cult. Land | 0.01   | 0.69    | 0.497   |
|                         |                      | Rice %       | -0.06    | -4.95   | < 0.001       |                         | Rice %       | -0.02  | -1.97   | 0.063                     |                     | Rice %       | 0.01   | 0.81    | 0.428   |
|                         | Possibility/Openness | Female       | 0.08     | 37.81   | < 0.001       | In/Outgroup: Dividing   | Female       | -0.01  | -2.93   | 0.003                     | Affect              | Female       | 0.26   | 137.08  | < 0.001 |
|                         |                      | Service Ind. | -0.05    | -2.34   | 0.030         |                         | Service Ind. | 0.07   | 2.16    | 0.043                     |                     | Service Ind. | -0.03  | -1.26   | 0.223   |
|                         |                      | % Urban      | 0.01     | 0.71    | 0.483         |                         | % Urban      | -0.03  | -1.01   | 0.322                     |                     | % Urban      | -0.04  | -1.70   | 0.103   |
|                         |                      | % Herding    | 0.004    | 0.53    | 0.601         |                         | % Herding    | -0.01  | -0.66   | 0.512                     |                     | % Herding    | 0.01   | 1.65    | 0.112   |
|                         |                      | % Cult. Land | -0.02    | -1.65   | 0.115         |                         | % Cult. Land | 0.003  | 0.17    | 0.870                     |                     | % Cult. Land | -0.03  | -2.18   | 0.040   |
|                         |                      | Rice %       | -0.05    | -4.03   | < 0.001       |                         | Rice %       | 0.02   | 0.96    | 0.347                     |                     | Rice %       | -0.02  | -1.08   | 0.294   |
| Assent                  | Female               | 0.18         | 93.53    | < 0.001 | Self          | Female                  | -0.05        | -17.61 | < 0.001 | Cog. & Dis. Non-Fluencies | Female              | 0.18         | 90.23  | < 0.001 |         |
|                         | Service Ind.         | 0.03         | 0.81     | 0.426   |               | Service Ind.            | 0.02         | 0.65   | 0.521   |                           | Service Ind.        | -0.01        | -0.43  | 0.668   |         |
|                         | % Urban              | -0.04        | -1.36    | 0.187   |               | % Urban                 | 0.004        | 0.21   | 0.836   |                           | % Urban             | -0.01        | -0.20  | 0.845   |         |
|                         | % Herding            | -0.01        | -0.97    | 0.342   |               | % Herding               | -0.01        | -1.06  | 0.300   |                           | % Herding           | -0.004       | -0.48  | 0.638   |         |
|                         | % Cult. Land         | -0.004       | -0.24    | 0.816   |               | % Cult. Land            | -0.01        | -1.11  | 0.279   |                           | % Cult. Land        | -0.01        | -0.52  | 0.606   |         |
|                         | Rice %               | 0.08         | 4.60     | < 0.001 |               | Rice %                  | -0.01        | -0.89  | 0.384   |                           | Rice %              | 0.06         | 3.43   | 0.002   |         |

Note: Service sector employment is the percentage of employed people that are employed in the service sector per province. Modernization theorist Inglehart has argued that the shift to the service sector economy is a better indicator of modernization than GDP. Analyses are hierarchical linear models nested in provinces.

**Table S12**

*Alternative Measures of Modernization: Private Industry*

| Word Category           |                      | $\beta$      | $t$    | $P$     | Word Category |                         | $\beta$      | $t$    | $P$     | Word Category             |                     | $\beta$      | $t$    | $P$     |         |
|-------------------------|----------------------|--------------|--------|---------|---------------|-------------------------|--------------|--------|---------|---------------------------|---------------------|--------------|--------|---------|---------|
| Cognition and Discourse | Cognitive Processes  | Female       | 0.08   | 40.98   | < 0.001       | Universalism            | Female       | -0.08  | -36.86  | < 0.001                   | Positivity/Optimism | Female       | 0.001  | 0.66    | 0.507   |
|                         |                      | Private Ind. | -0.02  | -0.69   | 0.496         |                         | Private Ind. | 0.07   | 3.16    | 0.005                     |                     | Private Ind. | -0.001 | -0.03   | 0.976   |
|                         |                      | % Urban      | -0.02  | -0.97   | 0.344         |                         | % Urban      | -0.03  | -2.30   | 0.031                     |                     | % Urban      | -0.03  | -1.31   | 0.204   |
|                         |                      | % Herding    | 0.01   | 1.40    | 0.174         |                         | % Herding    | 0.01   | 1.36    | 0.183                     |                     | % Herding    | 0.01   | 0.92    | 0.366   |
|                         |                      | % Cult. Land | -0.003 | -0.20   | 0.847         |                         | % Cult. Land | -0.03  | -2.39   | 0.025                     |                     | % Cult. Land | -0.01  | -0.58   | 0.565   |
|                         |                      | Rice %       | -0.06  | -3.59   | 0.002         |                         | Rice %       | -0.07  | -5.54   | < 0.001                   |                     | Rice %       | -0.08  | -3.67   | 0.001   |
|                         | Causation            | Female       | -0.12  | -58.55  | < 0.001       | Humans                  | Female       | 0.11   | 55.51   | < 0.001                   | Achievement         | Female       | -0.21  | -109.01 | < 0.001 |
|                         |                      | Private Ind. | 0.01   | 0.34    | 0.734         |                         | Private Ind. | 0.02   | 0.62    | 0.539                     |                     | Private Ind. | 0.01   | 0.27    | 0.792   |
|                         |                      | % Urban      | -0.002 | -0.07   | 0.944         |                         | % Urban      | -0.06  | -2.12   | 0.045                     |                     | % Urban      | 0.01   | 0.31    | 0.763   |
|                         |                      | % Herding    | 0.01   | 1.29    | 0.208         |                         | % Herding    | 0.02   | 1.69    | 0.103                     |                     | % Herding    | 0.01   | 1.23    | 0.231   |
|                         |                      | % Cult. Land | 0.001  | 0.05    | 0.960         |                         | % Cult. Land | -0.02  | -0.76   | 0.454                     |                     | % Cult. Land | 0.003  | 0.13    | 0.900   |
|                         |                      | Rice %       | -0.07  | -3.95   | < 0.001       |                         | Rice %       | -0.08  | -3.78   | < 0.001                   |                     | Rice %       | -0.07  | -3.47   | 0.002   |
|                         | Certainty            | Female       | 0.09   | 45.01   | < 0.001       | In/Outgroup: Connecting | Female       | 0.0003 | 0.12    | 0.904                     | Fashion and Trends  | Female       | 0.04   | 15.56   | < 0.001 |
|                         |                      | Private Ind. | -0.02  | -0.60   | 0.554         |                         | Private Ind. | 0.03   | 1.21    | 0.240                     |                     | Private Ind. | -0.01  | -0.59   | 0.564   |
|                         |                      | % Urban      | -0.02  | -1.25   | 0.226         |                         | % Urban      | -0.05  | -3.63   | 0.002                     |                     | % Urban      | 0.02   | 1.06    | 0.302   |
|                         |                      | % Herding    | 0.01   | 1.20    | 0.240         |                         | % Herding    | 0.02   | 2.29    | 0.030                     |                     | % Herding    | 0.01   | 0.85    | 0.401   |
|                         |                      | % Cult. Land | -0.01  | -0.97   | 0.344         |                         | % Cult. Land | -0.02  | -2.04   | 0.054                     |                     | % Cult. Land | 0.01   | 0.76    | 0.454   |
|                         |                      | Rice %       | -0.05  | -3.67   | 0.001         |                         | Rice %       | -0.03  | -2.45   | 0.023                     |                     | Rice %       | 0.01   | 0.90    | 0.377   |
|                         | Possibility/Openness | Female       | 0.08   | 37.82   | < 0.001       | In/Outgroup: Dividing   | Female       | -0.01  | -2.93   | 0.003                     | Affect              | Female       | 0.26   | 137.08  | < 0.001 |
|                         |                      | Private Ind. | -0.04  | -1.44   | 0.166         |                         | Private Ind. | 0.07   | 1.87    | 0.076                     |                     | Private Ind. | -0.03  | -1.13   | 0.272   |
|                         |                      | % Urban      | -0.003 | -0.17   | 0.869         |                         | % Urban      | -0.01  | -0.51   | 0.616                     |                     | % Urban      | -0.04  | -2.16   | 0.042   |
|                         |                      | % Herding    | 0.01   | 1.04    | 0.309         |                         | % Herding    | -0.02  | -1.32   | 0.197                     |                     | % Herding    | 0.02   | 1.95    | 0.063   |
|                         |                      | % Cult. Land | -0.003 | -0.21   | 0.836         |                         | % Cult. Land | -0.03  | -1.43   | 0.167                     |                     | % Cult. Land | -0.02  | -1.19   | 0.246   |
|                         |                      | Rice %       | -0.03  | -2.14   | 0.043         |                         | Rice %       | -0.02  | -0.73   | 0.470                     |                     | Rice %       | -0.002 | -0.12   | 0.908   |
| Assent                  | Female               | 0.18         | 93.52  | < 0.001 | Self          | Female                  | -0.05        | -17.61 | < 0.001 | Cog. & Dis. Non-Fluencies | Female              | 0.18         | 90.23  | < 0.001 |         |
|                         | Private Ind.         | -0.03        | -0.81  | 0.426   |               | Private Ind.            | 0.02         | 0.74   | 0.466   |                           | Private Ind.        | -0.04        | -1.03  | 0.314   |         |
|                         | % Urban              | -0.005       | -0.18  | 0.857   |               | % Urban                 | 0.01         | 0.29   | 0.772   |                           | % Urban             | 0.003        | 0.14   | 0.886   |         |
|                         | % Herding            | -0.01        | -0.60  | 0.556   |               | % Herding               | -0.01        | -1.27  | 0.215   |                           | % Herding           | -0.001       | -0.05  | 0.959   |         |
|                         | % Cult. Land         | -0.002       | -0.09  | 0.932   |               | % Cult. Land            | -0.02        | -1.56  | 0.132   |                           | % Cult. Land        | 0.001        | 0.06   | 0.950   |         |
|                         | Rice %               | 0.09         | 4.30   | < 0.001 |               | Rice %                  | -0.02        | -1.31  | 0.204   |                           | Rice %              | 0.07         | 3.69   | 0.001   |         |

Note: Private industry employment is the percentage of employed people that are employed in private industry per province. This represents modernization in China's shift from the state-run economy to private enterprise. Analyses are hierarchical linear models nested in provinces.

**Table S13**

*Alternative Measures of Modernization: Internet Penetration*

| Word Category           |                      | $\beta$       | $t$    | $P$     | Word Category |                         | $\beta$       | $t$    | $P$     | Word Category |                     | $\beta$       | $t$   | $P$     |         |
|-------------------------|----------------------|---------------|--------|---------|---------------|-------------------------|---------------|--------|---------|---------------|---------------------|---------------|-------|---------|---------|
| Cognition and Discourse | Cognitive Processes  | Female        | 0.08   | 40.98   | < 0.001       | Universalism            | Female        | -0.08  | -36.84  | < 0.001       | Positivity/Optimism | Female        | 0.001 | 0.67    | 0.506   |
|                         |                      | Internet Pen. | -0.04  | -1.21   | 0.240         |                         | Internet Pen. | 0.04   | 1.52    | 0.144         |                     | Internet Pen. | 0.01  | 0.23    | 0.823   |
|                         |                      | % Urban       | 0.0003 | 0.01    | 0.992         |                         | % Urban       | -0.03  | -1.30   | 0.205         |                     | % Urban       | -0.04 | -1.14   | 0.267   |
|                         |                      | % Herding     | 0.01   | 1.35    | 0.188         |                         | % Herding     | 0.02   | 2.38    | 0.025         |                     | % Herding     | 0.01  | 0.96    | 0.346   |
|                         |                      | % Cult. Land  | -0.01  | -0.76   | 0.455         |                         | % Cult. Land  | -0.01  | -0.63   | 0.534         |                     | % Cult. Land  | -0.01 | -0.62   | 0.544   |
|                         |                      | Rice %        | -0.07  | -4.22   | < 0.001       |                         | Rice %        | -0.05  | -4.35   | < 0.001       |                     | Rice %        | -0.08 | -4.20   | < 0.001 |
|                         | Causation            | Female        | -0.12  | -58.55  | < 0.001       | Humans                  | Female        | 0.11   | 55.51   | < 0.001       | Achievement         | Female        | -0.21 | -109.00 | < 0.001 |
|                         |                      | Internet Pen. | 0.02   | 0.61    | 0.550         |                         | Internet Pen. | -0.004 | -0.09   | 0.933         |                     | Internet Pen. | 0.05  | 1.28    | 0.214   |
|                         |                      | % Urban       | -0.01  | -0.41   | 0.688         |                         | % Urban       | -0.04  | -1.08   | 0.293         |                     | % Urban       | -0.03 | -0.76   | 0.452   |
|                         |                      | % Herding     | 0.01   | 1.49    | 0.149         |                         | % Herding     | 0.02   | 2.07    | 0.049         |                     | % Herding     | 0.01  | 1.36    | 0.184   |
|                         |                      | % Cult. Land  | 0.01   | 0.33    | 0.746         |                         | % Cult. Land  | -0.01  | -0.55   | 0.587         |                     | % Cult. Land  | 0.01  | 0.49    | 0.629   |
|                         |                      | Rice %        | -0.07  | -4.45   | < 0.001       |                         | Rice %        | -0.07  | -3.83   | < 0.001       |                     | Rice %        | -0.07 | -4.21   | < 0.001 |
|                         | Certainty            | Female        | 0.09   | 45.00   | < 0.001       | In/Outgroup: Connecting | Female        | 0.0003 | 0.13    | 0.895         | Fashion and Trends  | Female        | 0.04  | 15.58   | < 0.001 |
|                         |                      | Internet Pen. | -0.03  | -0.96   | 0.349         |                         | Internet Pen. | 0.03   | 1.43    | 0.168         |                     | Internet Pen. | 0.03  | 1.08    | 0.291   |
|                         |                      | % Urban       | -0.01  | -0.33   | 0.741         |                         | % Urban       | -0.07  | -3.18   | 0.004         |                     | % Urban       | -0.01 | -0.55   | 0.587   |
|                         |                      | % Herding     | 0.01   | 1.14    | 0.267         |                         | % Herding     | 0.02   | 2.95    | 0.007         |                     | % Herding     | 0.004 | 0.63    | 0.531   |
|                         |                      | % Cult. Land  | -0.02  | -1.56   | 0.134         |                         | % Cult. Land  | -0.01  | -1.37   | 0.187         |                     | % Cult. Land  | 0.01  | 0.78    | 0.445   |
|                         |                      | Rice %        | -0.05  | -4.34   | < 0.001       |                         | Rice %        | -0.03  | -2.48   | 0.023         |                     | Rice %        | 0.004 | 0.42    | 0.680   |
|                         | Possibility/Openness | Female        | 0.08   | 37.81   | < 0.001       | In/Outgroup: Dividing   | Female        | -0.01  | -2.88   | 0.004         | Affect              | Female        | 0.26  | 137.07  | < 0.001 |
|                         |                      | Internet Pen. | -0.03  | -1.12   | 0.276         |                         | Internet Pen. | 0.11   | 3.10    | 0.005         |                     | Internet Pen. | -0.06 | -1.84   | 0.079   |
|                         |                      | % Urban       | 0.004  | 0.16    | 0.877         |                         | % Urban       | -0.07  | -2.10   | 0.046         |                     | % Urban       | -0.02 | -0.56   | 0.580   |
|                         |                      | % Herding     | 0.004  | 0.61    | 0.547         |                         | % Herding     | -0.01  | -0.81   | 0.422         |                     | % Herding     | 0.01  | 1.87    | 0.074   |
|                         |                      | % Cult. Land  | -0.02  | -1.13   | 0.271         |                         | % Cult. Land  | 0.004  | 0.29    | 0.775         |                     | % Cult. Land  | -0.03 | -2.26   | 0.034   |
|                         |                      | Rice %        | -0.04  | -2.92   | 0.008         |                         | Rice %        | -0.01  | -0.39   | 0.703         |                     | Rice %        | -0.01 | -0.36   | 0.719   |
| Assent                  | Female               | 0.18          | 93.52  | < 0.001 | Self          | Female                  | -0.05         | -17.59 | < 0.001 | Non-Fluencies | Female              | 0.18          | 90.22 | < 0.001 |         |
|                         | Internet Pen.        | -0.04         | -0.93  | 0.365   |               | Internet Pen.           | 0.07          | 2.61   | 0.015   |               | Internet Pen.       | -0.07         | -1.91 | 0.069   |         |
|                         | % Urban              | 0.01          | 0.26   | 0.800   |               | % Urban                 | -0.04         | -1.68  | 0.104   |               | % Urban             | 0.04          | 1.23  | 0.232   |         |
|                         | % Herding            | -0.01         | -0.90  | 0.377   |               | % Herding               | -0.01         | -1.35  | 0.186   |               | % Herding           | -0.003        | -0.33 | 0.747   |         |
|                         | % Cult. Land         | -0.01         | -0.64  | 0.531   |               | % Cult. Land            | -0.01         | -0.94  | 0.360   |               | % Cult. Land        | -0.01         | -0.76 | 0.454   |         |
|                         | Rice %               | 0.09          | 4.67   | < 0.001 |               | Rice %                  | -0.02         | -1.83  | 0.082   |               | Rice %              | 0.07          | 4.23  | < 0.001 |         |

Note: Internet penetration statistics are the percentages of internet users to total province population from the *China Internet Development Report 2008*. Internet penetration is an alternative indicator of modernization that is less sensitive to manipulation. Analyses are hierarchical linear models nested in provinces.

**Table S14**

*Alternative Measures of Modernization: Historical GDP per Capita*

| Word Category           |                      | $\beta$      | $t$    | $P$     | Word Category |                         | $\beta$      | $t$    | $P$     | Word Category |                     | $\beta$      | $t$    | $P$     |         |
|-------------------------|----------------------|--------------|--------|---------|---------------|-------------------------|--------------|--------|---------|---------------|---------------------|--------------|--------|---------|---------|
| Cognition and Discourse | Cognitive Processes  | Female       | 0.08   | 40.98   | < 0.001       | Universalism            | Female       | -0.08  | -36.85  | < 0.001       | Positivity/Optimism | Female       | 0.001  | 0.66    | 0.507   |
|                         |                      | GDP 1995     | -0.05  | -1.30   | 0.206         |                         | GDP 1995     | 0.07   | 2.28    | 0.033         |                     | GDP 1995     | -0.02  | -0.33   | 0.742   |
|                         |                      | % Urban      | 0.003  | 0.10    | 0.922         |                         | % Urban      | -0.05  | -1.99   | 0.060         |                     | % Urban      | -0.02  | -0.63   | 0.533   |
|                         |                      | % Herding    | 0.02   | 1.70    | 0.101         |                         | % Herding    | 0.01   | 1.36    | 0.187         |                     | % Herding    | 0.01   | 1.03    | 0.313   |
|                         |                      | % Cult. Land | 0.002  | 0.10    | 0.919         |                         | % Cult. Land | -0.02  | -1.94   | 0.066         |                     | % Cult. Land | -0.01  | -0.43   | 0.669   |
|                         |                      | Rice %       | -0.06  | -3.35   | 0.003         |                         | Rice %       | -0.06  | -4.87   | < 0.001       |                     | Rice %       | -0.07  | -3.50   | 0.002   |
|                         | Causation            | Female       | -0.12  | -58.55  | < 0.001       | Humans                  | Female       | 0.11   | 55.51   | < 0.001       | Achievement         | Female       | -0.21  | -109.01 | < 0.001 |
|                         |                      | GDP 1995     | -0.001 | -0.02   | 0.983         |                         | GDP 1995     | -0.01  | -0.12   | 0.904         |                     | GDP 1995     | 0.02   | 0.33    | 0.741   |
|                         |                      | % Urban      | 0.005  | 0.15    | 0.884         |                         | % Urban      | -0.04  | -1.03   | 0.312         |                     | % Urban      | 0.002  | 0.06    | 0.956   |
|                         |                      | % Herding    | 0.01   | 1.38    | 0.180         |                         | % Herding    | 0.02   | 1.90    | 0.068         |                     | % Herding    | 0.01   | 1.14    | 0.267   |
|                         |                      | % Cult. Land | 0.004  | 0.21    | 0.838         |                         | % Cult. Land | -0.01  | -0.43   | 0.674         |                     | % Cult. Land | 0.002  | 0.08    | 0.934   |
|                         |                      | Rice %       | -0.07  | -3.75   | 0.001         |                         | Rice %       | -0.07  | -3.36   | 0.003         |                     | Rice %       | -0.07  | -3.50   | 0.002   |
|                         | Certainty            | Female       | 0.09   | 45.00   | < 0.001       | In/Outgroup: Connecting | Female       | 0.0003 | 0.12    | 0.903         | Fashion and Trends  | Female       | 0.04   | 15.57   | < 0.001 |
|                         |                      | GDP 1995     | -0.05  | -1.43   | 0.166         |                         | GDP 1995     | 0.02   | 0.81    | 0.428         |                     | GDP 1995     | 0.02   | 0.64    | 0.526   |
|                         |                      | % Urban      | 0.002  | 0.06    | 0.951         |                         | % Urban      | -0.06  | -2.56   | 0.018         |                     | % Urban      | -0.004 | -0.16   | 0.873   |
|                         |                      | % Herding    | 0.01   | 1.61    | 0.120         |                         | % Herding    | 0.02   | 2.29    | 0.030         |                     | % Herding    | 0.002  | 0.33    | 0.741   |
|                         |                      | % Cult. Land | -0.01  | -0.60   | 0.557         |                         | % Cult. Land | -0.02  | -1.83   | 0.082         |                     | % Cult. Land | 0.002  | 0.17    | 0.869   |
|                         |                      | Rice %       | -0.05  | -3.37   | 0.003         |                         | Rice %       | -0.03  | -2.21   | 0.038         |                     | Rice %       | 0.003  | 0.23    | 0.816   |
|                         | Possibility/Openness | Female       | 0.08   | 37.81   | < 0.001       | In/Outgroup: Dividing   | Female       | -0.01  | -2.93   | 0.003         | Affect              | Female       | 0.26   | 137.08  | < 0.001 |
|                         |                      | GDP 1995     | -0.05  | -1.34   | 0.194         |                         | GDP 1995     | 0.14   | 2.98    | 0.007         |                     | GDP 1995     | -0.03  | -0.85   | 0.406   |
|                         |                      | % Urban      | 0.01   | 0.35    | 0.731         |                         | % Urban      | -0.07  | -1.99   | 0.059         |                     | % Urban      | -0.04  | -1.31   | 0.203   |
|                         |                      | % Herding    | 0.01   | 1.07    | 0.297         |                         | % Herding    | -0.02  | -1.96   | 0.059         |                     | % Herding    | 0.02   | 1.83    | 0.079   |
|                         |                      | % Cult. Land | -0.003 | -0.22   | 0.830         |                         | % Cult. Land | -0.04  | -2.02   | 0.057         |                     | % Cult. Land | -0.02  | -1.25   | 0.223   |
|                         |                      | Rice %       | -0.03  | -2.15   | 0.042         |                         | Rice %       | -0.03  | -1.39   | 0.176         |                     | Rice %       | -0.004 | -0.25   | 0.805   |
| Assent                  | Female               | 0.18         | 93.52  | < 0.001 | Self          | Female                  | -0.05        | -17.61 | < 0.001 | Non-Fluencies | Female              | 0.18         | 90.23  | < 0.001 |         |
|                         | GDP 1995             | -0.01        | -0.14  | 0.892   |               | GDP 1995                | 0.04         | 1.23   | 0.233   |               | GDP 1995            | -0.03        | -0.71  | 0.487   |         |
|                         | % Urban              | -0.02        | -0.42  | 0.676   |               | % Urban                 | -0.01        | -0.50  | 0.624   |               | % Urban             | 0.01         | 0.20   | 0.845   |         |
|                         | % Herding            | -0.01        | -0.81  | 0.428   |               | % Herding               | -0.01        | -1.52  | 0.139   |               | % Herding           | -0.001       | -0.11  | 0.916   |         |
|                         | % Cult. Land         | -0.01        | -0.36  | 0.724   |               | % Cult. Land            | -0.02        | -1.82  | 0.083   |               | % Cult. Land        | -0.001       | -0.05  | 0.964   |         |
|                         | Rice %               | 0.08         | 3.91   | < 0.001 |               | Rice %                  | -0.02        | -1.59  | 0.126   |               | Rice %              | 0.07         | 3.48   | 0.002   |         |

Note: Provincial GDP per capita statistics are year 1995 in RMB. Studies have found a lag between economic growth and cultural change, so we tested this historical indicator of economic development. Analyses are hierarchical linear models nested in provinces.

**Table S15**

*Alternative Measures of Modernization: Historical Service Industry*

| Word Category           |                      | $\beta$         | $t$    | $P$     | Word Category |                         | $\beta$         | $t$    | $P$     | Word Category |                     | $\beta$         | $t$   | $P$     |         |
|-------------------------|----------------------|-----------------|--------|---------|---------------|-------------------------|-----------------|--------|---------|---------------|---------------------|-----------------|-------|---------|---------|
| Cognition and Discourse | Cognitive Processes  | Female          | 0.08   | 40.98   | < 0.001       | Universalism            | Female          | -0.08  | -36.86  | < 0.001       | Positivity/Optimism | Female          | 0.001 | 0.66    | 0.508   |
|                         |                      | Serv. Ind. 1995 | -0.03  | -1.62   | 0.118         |                         | Serv. Ind. 1995 | 0.01   | 0.57    | 0.574         |                     | Serv. Ind. 1995 | -0.03 | -1.32   | 0.197   |
|                         |                      | % Urban         | -0.01  | -0.55   | 0.584         |                         | % Urban         | -0.01  | -0.33   | 0.741         |                     | % Urban         | -0.01 | -0.60   | 0.557   |
|                         |                      | % Herding       | 0.002  | 0.15    | 0.880         |                         | % Herding       | 0.02   | 2.28    | 0.031         |                     | % Herding       | 0.001 | 0.10    | 0.920   |
|                         |                      | % Cult. Land    | -0.01  | -0.85   | 0.405         |                         | % Cult. Land    | -0.01  | -0.80   | 0.433         |                     | % Cult. Land    | -0.02 | -0.90   | 0.379   |
|                         |                      | Rice %          | -0.08  | -5.07   | < 0.001       |                         | Rice %          | -0.05  | -3.62   | 0.001         |                     | Rice %          | -0.08 | -4.65   | < 0.001 |
|                         | Causation            | Female          | -0.12  | -58.56  | < 0.001       | Humans                  | Female          | 0.11   | 55.50   | < 0.001       | Achievement         | Female          | -0.21 | -109.01 | < 0.001 |
|                         |                      | Serv. Ind. 1995 | -0.03  | -1.69   | 0.104         |                         | Serv. Ind. 1995 | -0.04  | -1.59   | 0.125         |                     | Serv. Ind. 1995 | -0.02 | -1.05   | 0.303   |
|                         |                      | % Urban         | 0.03   | 1.39    | 0.178         |                         | % Urban         | -0.02  | -0.79   | 0.439         |                     | % Urban         | 0.03  | 1.29    | 0.210   |
|                         |                      | % Herding       | 0.004  | 0.40    | 0.696         |                         | % Herding       | 0.01   | 0.92    | 0.367         |                     | % Herding       | 0.01  | 0.63    | 0.537   |
|                         |                      | % Cult. Land    | -0.001 | -0.05   | 0.958         |                         | % Cult. Land    | -0.02  | -0.82   | 0.419         |                     | % Cult. Land    | 0.002 | 0.09    | 0.926   |
|                         |                      | Rice %          | -0.08  | -4.90   | < 0.001       |                         | Rice %          | -0.08  | -4.45   | < 0.001       |                     | Rice %          | -0.07 | -4.09   | < 0.001 |
|                         | Certainty            | Female          | 0.09   | 45.01   | < 0.001       | In/Outgroup: Connecting | Female          | 0.0002 | 0.12    | 0.907         | Fashion and Trends  | Female          | 0.04  | 15.57   | < 0.001 |
|                         |                      | Serv. Ind. 1995 | -0.01  | -0.93   | 0.362         |                         | Serv. Ind. 1995 | -0.02  | -1.27   | 0.217         |                     | Serv. Ind. 1995 | 0.01  | 0.60    | 0.556   |
|                         |                      | % Urban         | -0.02  | -1.18   | 0.250         |                         | % Urban         | -0.03  | -1.95   | 0.063         |                     | % Urban         | 0.003 | 0.19    | 0.854   |
|                         |                      | % Herding       | 0.003  | 0.36    | 0.720         |                         | % Herding       | 0.01   | 1.79    | 0.087         |                     | % Herding       | 0.01  | 0.89    | 0.378   |
|                         |                      | % Cult. Land    | -0.02  | -1.56   | 0.135         |                         | % Cult. Land    | -0.02  | -1.90   | 0.073         |                     | % Cult. Land    | 0.01  | 0.65    | 0.521   |
|                         |                      | Rice %          | -0.06  | -4.82   | < 0.001       |                         | Rice %          | -0.03  | -2.43   | 0.025         |                     | Rice %          | 0.01  | 0.83    | 0.417   |
|                         | Possibility/Openness | Female          | 0.08   | 37.82   | < 0.001       | In/Outgroup: Dividing   | Female          | -0.01  | -2.94   | 0.003         | Affect              | Female          | 0.26  | 137.08  | < 0.001 |
|                         |                      | Serv. Ind. 1995 | -0.02  | -1.29   | 0.209         |                         | Serv. Ind. 1995 | 0.03   | 1.30    | 0.204         |                     | Serv. Ind. 1995 | -0.02 | -1.05   | 0.306   |
|                         |                      | % Urban         | -0.01  | -0.41   | 0.689         |                         | % Urban         | -0.004 | -0.13   | 0.896         |                     | % Urban         | -0.05 | -2.51   | 0.019   |
|                         |                      | % Herding       | -0.002 | -0.29   | 0.778         |                         | % Herding       | 0.003  | 0.20    | 0.844         |                     | % Herding       | 0.01  | 0.77    | 0.447   |
|                         |                      | % Cult. Land    | -0.02  | -1.18   | 0.253         |                         | % Cult. Land    | -0.003 | -0.18   | 0.861         |                     | % Cult. Land    | -0.03 | -2.03   | 0.054   |
|                         |                      | Rice %          | -0.05  | -3.59   | 0.002         |                         | Rice %          | 0.02   | 0.78    | 0.442         |                     | Rice %          | -0.02 | -1.06   | 0.302   |
| Assent                  | Female               | 0.18            | 93.52  | < 0.001 | Self          | Female                  | -0.05           | -17.61 | < 0.001 | Non-Fluencies | Female              | 0.18            | 90.23 | < 0.001 |         |
|                         | Serv. Ind. 1995      | 0.01            | 0.49   | 0.627   |               | Serv. Ind. 1995         | -0.0001         | -0.01  | 0.994   |               | Serv. Ind. 1995     | 0.02            | 0.99  | 0.332   |         |
|                         | % Urban              | -0.03           | -1.20  | 0.243   |               | % Urban                 | 0.02            | 0.89   | 0.379   |               | % Urban             | -0.03           | -1.36 | 0.185   |         |
|                         | % Herding            | -0.01           | -0.53  | 0.598   |               | % Herding               | -0.01           | -0.88  | 0.384   |               | % Herding           | 0.002           | 0.16  | 0.875   |         |
|                         | % Cult. Land         | -0.01           | -0.39  | 0.700   |               | % Cult. Land            | -0.02           | -1.34  | 0.195   |               | % Cult. Land        | -0.004          | -0.25 | 0.805   |         |
|                         | Rice %               | 0.08            | 4.48   | < 0.001 |               | Rice %                  | -0.01           | -1.03  | 0.314   |               | Rice %              | 0.07            | 3.81  | < 0.001 |         |

Note: Studies have found a lag between economic growth and cultural change, so we tested this historical indicator of economic modernization. Analyses are hierarchical linear models nested in provinces. These analyses use the percentage of workers employed in the service industry as an indicator of modernization. As economies modernize, they tend to shift toward the service sector.

**Table S16**

*Alternative Measures of Modernization: Historical Private Industry*

| Word Category           |                      | $\beta$         | $t$    | $P$     | Word Category |                         | $\beta$         | $t$    | $P$     | Word Category         |                     | $\beta$         | $t$   | $P$     |         |
|-------------------------|----------------------|-----------------|--------|---------|---------------|-------------------------|-----------------|--------|---------|-----------------------|---------------------|-----------------|-------|---------|---------|
| Cognition and Discourse | Cognitive Processes  | Female          | 0.08   | 40.98   | < 0.001       | Universalism            | Female          | -0.08  | -36.86  | < 0.001               | Positivity/Optimism | Female          | 0.001 | 0.66    | 0.506   |
|                         |                      | Priv. Ind. 1995 | 0.02   | 0.69    | 0.495         |                         | Priv. Ind. 1995 | 0.02   | 1.29    | 0.210                 |                     | Priv. Ind. 1995 | 0.02  | 0.93    | 0.360   |
|                         |                      | % Urban         | -0.04  | -2.22   | 0.038         |                         | % Urban         | -0.01  | -0.69   | 0.500                 |                     | % Urban         | -0.05 | -2.20   | 0.039   |
|                         |                      | % Herding       | 0.01   | 1.25    | 0.222         |                         | % Herding       | 0.02   | 2.45    | 0.021                 |                     | % Herding       | 0.01  | 1.03    | 0.312   |
|                         |                      | % Cult. Land    | -0.01  | -0.69   | 0.498         |                         | % Cult. Land    | -0.01  | -1.21   | 0.242                 |                     | % Cult. Land    | -0.02 | -0.85   | 0.405   |
|                         |                      | Rice %          | -0.08  | -4.55   | < 0.001       |                         | Rice %          | -0.05  | -4.22   | 0.001                 |                     | Rice %          | -0.08 | -4.40   | < 0.001 |
|                         | Causation            | Female          | -0.12  | -58.55  | < 0.001       | Humans                  | Female          | 0.11   | 55.51   | < 0.001               | Achievement         | Female          | -0.21 | -109.01 | < 0.001 |
|                         |                      | Priv. Ind. 1995 | 0.02   | 0.77    | 0.451         |                         | Priv. Ind. 1995 | 0.03   | 1.24    | 0.226                 |                     | Priv. Ind. 1995 | 0.01  | 0.45    | 0.659   |
|                         |                      | % Urban         | -0.004 | -0.23   | 0.820         |                         | % Urban         | -0.06  | -2.79   | 0.011                 |                     | % Urban         | 0.01  | 0.35    | 0.732   |
|                         |                      | % Herding       | 0.01   | 1.58    | 0.127         |                         | % Herding       | 0.02   | 2.19    | 0.038                 |                     | % Herding       | 0.01  | 1.46    | 0.157   |
|                         |                      | % Cult. Land    | 0.001  | 0.06    | 0.950         |                         | % Cult. Land    | -0.01  | -0.80   | 0.433                 |                     | % Cult. Land    | 0.003 | 0.17    | 0.865   |
|                         |                      | Rice %          | -0.07  | -4.43   | < 0.001       |                         | Rice %          | -0.08  | -4.29   | < 0.001               |                     | Rice %          | -0.07 | -3.79   | < 0.001 |
|                         | Certainty            | Female          | 0.09   | 45.01   | < 0.001       | In/Outgroup: Connecting | Female          | 0.0002 | 0.12    | 0.906                 | Fashion and Trends  | Female          | 0.04  | 15.57   | < 0.001 |
|                         |                      | Priv. Ind. 1995 | 0.01   | 0.60    | 0.553         |                         | Priv. Ind. 1995 | -0.004 | -0.25   | 0.802                 |                     | Priv. Ind. 1995 | 0.01  | 0.85    | 0.403   |
|                         |                      | % Urban         | -0.04  | -2.43   | 0.025         |                         | % Urban         | -0.04  | -3.07   | 0.006                 |                     | % Urban         | 0.003 | 0.24    | 0.813   |
|                         |                      | % Herding       | 0.01   | 1.07    | 0.296         |                         | % Herding       | 0.02   | 2.91    | 0.007                 |                     | % Herding       | 0.004 | 0.67    | 0.507   |
|                         |                      | % Cult. Land    | -0.02  | -1.49   | 0.151         |                         | % Cult. Land    | -0.02  | -1.52   | 0.143                 |                     | % Cult. Land    | 0.003 | 0.32    | 0.749   |
|                         |                      | Rice %          | -0.06  | -4.57   | < 0.001       |                         | Rice %          | -0.02  | -1.81   | 0.084                 |                     | Rice %          | 0.003 | 0.29    | 0.776   |
|                         | Possibility/Openness | Female          | 0.08   | 37.82   | < 0.001       | In/Outgroup: Dividing   | Female          | -0.01  | -2.93   | 0.003                 | Affect              | Female          | 0.26  | 137.08  | < 0.001 |
|                         |                      | Priv. Ind. 1995 | 0.01   | 0.76    | 0.458         |                         | Priv. Ind. 1995 | 0.03   | 1.09    | 0.290                 |                     | Priv. Ind. 1995 | 0.003 | 0.17    | 0.868   |
|                         |                      | % Urban         | -0.03  | -1.91   | 0.071         |                         | % Urban         | 0.01   | 0.38    | 0.707                 |                     | % Urban         | -0.06 | -3.65   | 0.001   |
|                         |                      | % Herding       | 0.004  | 0.54    | 0.597         |                         | % Herding       | -0.01  | -0.63   | 0.535                 |                     | % Herding       | 0.01  | 1.61    | 0.120   |
|                         |                      | % Cult. Land    | -0.01  | -1.08   | 0.293         |                         | % Cult. Land    | -0.01  | -0.76   | 0.458                 |                     | % Cult. Land    | -0.03 | -1.83   | 0.081   |
|                         |                      | Rice %          | -0.05  | -3.32   | 0.003         |                         | Rice %          | -0.002 | -0.10   | 0.923                 |                     | Rice %          | -0.01 | -0.80   | 0.434   |
| Assent                  | Female               | 0.18            | 93.52  | < 0.001 | Self          | Female                  | -0.05           | -17.62 | < 0.001 | Cog. & Dis. Fluencies | Female              | 0.18            | 90.23 | < 0.001 |         |
|                         | Priv. Ind. 1995      | -0.03           | -1.07  | 0.297   |               | Priv. Ind. 1995         | 0.02            | 1.44   | 0.163   |                       | Priv. Ind. 1995     | -0.02           | -0.72 | 0.480   |         |
|                         | % Urban              | -0.01           | -0.33  | 0.741   |               | % Urban                 | 0.003           | 0.22   | 0.829   |                       | % Urban             | -0.01           | -0.32 | 0.751   |         |
|                         | % Herding            | -0.01           | -1.03  | 0.312   |               | % Herding               | -0.01           | -1.12  | 0.272   |                       | % Herding           | -0.005          | -0.50 | 0.622   |         |
|                         | % Cult. Land         | -0.005          | -0.27  | 0.793   |               | % Cult. Land            | -0.02           | -1.72  | 0.100   |                       | % Cult. Land        | -0.005          | -0.26 | 0.794   |         |
|                         | Rice %               | 0.09            | 4.66   | < 0.001 |               | Rice %                  | -0.02           | -1.60  | 0.123   |                       | Rice %              | 0.07            | 3.66  | 0.001   |         |

Note: Studies have found a lag between economic growth and cultural change, so we tested this historical indicator of economic modernization. Analyses are hierarchical linear models nested in provinces. This analysis uses the percentage of workers employed in private industry as a marker of modernization. This marker may be particularly important in representing China's shift from state-owned enterprises to private markets.

**Table S17***Rice-Wheat Differences Robust to Differences in Ethnic Homogeneity*

| Word Category           |                      | $\beta$      | $t$    | $P$     | Word Category |                         | $\beta$      | $t$    | $P$     | Word Category             |                     | $\beta$      | $t$    | $P$     |         |
|-------------------------|----------------------|--------------|--------|---------|---------------|-------------------------|--------------|--------|---------|---------------------------|---------------------|--------------|--------|---------|---------|
| Cognition and Discourse | Cognitive Processes  | Female       | 0.08   | 40.98   | < 0.001       | Universalism            | Female       | -0.08  | -36.85  | < 0.001                   | Positivity/Optimism | Female       | 0.001  | 0.67    | 0.506   |
|                         |                      | GDP          | -0.005 | -0.11   | 0.917         |                         | GDP          | -0.02  | -0.60   | 0.553                     |                     | GDP          | -0.02  | -0.44   | 0.663   |
|                         |                      | % Urban      | -0.02  | -0.48   | 0.639         |                         | % Urban      | 0.03   | 0.76    | 0.456                     |                     | % Urban      | -0.01  | -0.10   | 0.918   |
|                         |                      | % Han        | -0.01  | -1.25   | 0.223         |                         | % Han        | -0.01  | -1.17   | 0.256                     |                     | % Han        | -0.01  | -1.07   | 0.294   |
|                         |                      | % Cult. Land | -0.01  | -0.29   | 0.775         |                         | % Cult. Land | -0.02  | -1.04   | 0.309                     |                     | % Cult. Land | -0.01  | -0.36   | 0.719   |
|                         |                      | Rice %       | -0.08  | -5.69   | < 0.001       |                         | Rice %       | -0.06  | -5.53   | < 0.001                   |                     | Rice %       | -0.08  | -5.41   | < 0.001 |
|                         | Causation            | Female       | -0.12  | -58.55  | < 0.001       | Humans                  | Female       | 0.11   | 55.51   | < 0.001                   | Achievement         | Female       | -0.21  | -109.01 | < 0.001 |
|                         |                      | GDP          | 0.002  | 0.03    | 0.975         |                         | GDP          | -0.04  | -0.74   | 0.466                     |                     | GDP          | 0.01   | 0.13    | 0.896   |
|                         |                      | % Urban      | 0.01   | 0.14    | 0.887         |                         | % Urban      | 0.01   | 0.12    | 0.903                     |                     | % Urban      | 0.01   | 0.18    | 0.855   |
|                         |                      | % Han        | -0.01  | -1.14   | 0.266         |                         | % Han        | -0.02  | -1.97   | 0.061                     |                     | % Han        | -0.004 | -0.44   | 0.664   |
|                         |                      | % Cult. Land | 0.004  | 0.19    | 0.848         |                         | % Cult. Land | -0.004 | -0.18   | 0.859                     |                     | % Cult. Land | -0.003 | -0.15   | 0.882   |
|                         |                      | Rice %       | -0.08  | -5.56   | < 0.001       |                         | Rice %       | -0.09  | -5.53   | < 0.001                   |                     | Rice %       | -0.08  | -5.07   | < 0.001 |
|                         | Certainty            | Female       | 0.09   | 45.01   | < 0.001       | In/Outgroup: Connecting | Female       | 0.0003 | 0.13    | 0.899                     | Fashion and Trends  | Female       | 0.04   | 15.57   | < 0.001 |
|                         |                      | GDP          | -0.02  | -0.48   | 0.636         |                         | GDP          | 0.01   | 0.31    | 0.759                     |                     | GDP          | -0.005 | -0.16   | 0.877   |
|                         |                      | % Urban      | -0.01  | -0.19   | 0.849         |                         | % Urban      | -0.05  | -1.15   | 0.264                     |                     | % Urban      | 0.02   | 0.46    | 0.647   |
|                         |                      | % Han        | -0.005 | -0.65   | 0.524         |                         | % Han        | -0.01  | -1.09   | 0.286                     |                     | % Han        | -0.001 | -0.10   | 0.923   |
|                         |                      | % Cult. Land | -0.02  | -1.26   | 0.221         |                         | % Cult. Land | -0.03  | -1.89   | 0.076                     |                     | % Cult. Land | 0.003  | 0.26    | 0.799   |
|                         |                      | Rice %       | -0.06  | -5.93   | < 0.001       |                         | Rice %       | -0.04  | -3.42   | 0.003                     |                     | Rice %       | 0.003  | 0.30    | 0.766   |
|                         | Possibility/Openness | Female       | 0.08   | 37.82   | < 0.001       | In/Outgroup: Dividing   | Female       | -0.01  | -2.93   | 0.003                     | Affect              | Female       | 0.26   | 137.09  | < 0.001 |
|                         |                      | GDP          | 0.01   | 0.15    | 0.883         |                         | GDP          | -0.10  | -1.77   | 0.091                     |                     | GDP          | -0.06  | -1.36   | 0.189   |
|                         |                      | % Urban      | -0.03  | -0.64   | 0.529         |                         | % Urban      | 0.12   | 2.06    | 0.054                     |                     | % Urban      | 0.001  | 0.03    | 0.977   |
|                         |                      | % Han        | -0.01  | -0.79   | 0.435         |                         | % Han        | -0.002 | -0.24   | 0.812                     |                     | % Han        | -0.02  | -2.42   | 0.023   |
|                         |                      | % Cult. Land | -0.01  | -0.61   | 0.548         |                         | % Cult. Land | 0.003  | 0.18    | 0.863                     |                     | % Cult. Land | -0.02  | -0.97   | 0.345   |
|                         |                      | Rice %       | -0.04  | -3.78   | 0.001         |                         | Rice %       | 0.01   | 0.40    | 0.692                     |                     | Rice %       | -0.02  | -1.74   | 0.096   |
| Assent                  | Female               | 0.18         | 93.52  | < 0.001 | Self          | Female                  | -0.05        | -17.61 | < 0.001 | Cog. & Dis. Non-Fluencies | Female              | 0.18         | 90.23  | < 0.001 |         |
|                         | GDP                  | -0.001       | -0.02  | 0.986   |               | GDP                     | 0.01         | 0.23   | 0.818   |                           | GDP                 | -0.02        | -0.41  | 0.686   |         |
|                         | % Urban              | -0.02        | -0.39  | 0.701   |               | % Urban                 | 0.003        | 0.08   | 0.937   |                           | % Urban             | 0.01         | 0.09   | 0.930   |         |
|                         | % Han                | 0.003        | 0.29   | 0.777   |               | % Han                   | 0.01         | 1.17   | 0.253   |                           | % Han               | -0.002       | -0.22  | 0.828   |         |
|                         | % Cult. Land         | -0.003       | -0.14  | 0.886   |               | % Cult. Land            | -0.02        | -1.45  | 0.163   |                           | % Cult. Land        | 0.0001       | 0.004  | 0.996   |         |
|                         | Rice %               | 0.09         | 5.64   | < 0.001 |               | Rice %                  | -0.01        | -0.86  | 0.397   |                           | Rice %              | 0.07         | 4.41   | < 0.001 |         |

Note: We indexed ethnic homogeneity using the percentage of ethnic Han per province, according to the 2000 Census. Ethnic Han are relevant because (1) different ethnicities may have substantively different cultures, (2) some ethnic groups speak in dialects or even language families that are different from the majority Han, and (3) this percentage reflects ethnic homogeneity. However, percent Han did not meaningfully predict regional differences in language use. Provincial GDP per capita statistics are from 2012 in RMB. The analyses in the main text use 2014 GDP at the request of a reviewer, but 2012 and 2014 GDP correlate  $r = 0.99$ , so the difference is negligible. Analyses are hierarchical linear models nested in provinces.

**Table S18**

*Rice-Wheat Differences Robust to Pathogen Prevalence*

| Word Category           |                      | $\beta$      | $t$    | $P$     | Word Category |                         | $\beta$      | $t$    | $P$     | Word Category             |                     | $\beta$      | $t$    | $P$     |         |
|-------------------------|----------------------|--------------|--------|---------|---------------|-------------------------|--------------|--------|---------|---------------------------|---------------------|--------------|--------|---------|---------|
| Cognition and Discourse | Cognitive Processes  | Female       | 0.08   | 40.99   | < 0.001       | Universalism            | Female       | -0.08  | -36.85  | < 0.001                   | Positivity/Optimism | Female       | 0.001  | 0.66    | 0.507   |
|                         |                      | Path. Prev.  | -0.01  | -0.87   | 0.393         |                         | Path. Prev.  | -0.01  | -0.79   | 0.437                     |                     | Path. Prev.  | -0.002 | -0.15   | 0.879   |
|                         |                      | % Urban      | -0.04  | -2.38   | 0.027         |                         | % Urban      | -0.005 | -0.34   | 0.740                     |                     | % Urban      | -0.04  | -1.78   | 0.089   |
|                         |                      | % Herding    | 0.01   | 1.10    | 0.280         |                         | % Herding    | 0.02   | 2.24    | 0.033                     |                     | % Herding    | 0.01   | 0.95    | 0.349   |
|                         |                      | % Cult. Land | -0.01  | -0.65   | 0.523         |                         | % Cult. Land | -0.01  | -1.01   | 0.325                     |                     | % Cult. Land | -0.01  | -0.67   | 0.507   |
|                         |                      | Rice %       | -0.07  | -4.50   | < 0.001       |                         | Rice %       | -0.05  | -3.84   | < 0.001                   |                     | Rice %       | -0.08  | -4.23   | < 0.001 |
|                         | Causation            | Female       | -0.12  | -58.55  | < 0.001       | Humans                  | Female       | 0.11   | 55.51   | < 0.001                   | Achievement         | Female       | -0.21  | -109.01 | < 0.001 |
|                         |                      | Path. Prev.  | -0.01  | -1.40   | 0.175         |                         | Path. Prev.  | -0.004 | -0.27   | 0.787                     |                     | Path. Prev.  | -0.01  | -0.98   | 0.337   |
|                         |                      | % Urban      | -0.01  | -0.51   | 0.618         |                         | % Urban      | -0.05  | -2.23   | 0.036                     |                     | % Urban      | 0.003  | 0.13    | 0.898   |
|                         |                      | % Herding    | 0.01   | 1.39    | 0.176         |                         | % Herding    | 0.02   | 2.02    | 0.054                     |                     | % Herding    | 0.01   | 1.31    | 0.201   |
|                         |                      | % Cult. Land | 0.001  | 0.09    | 0.930         |                         | % Cult. Land | -0.01  | -0.57   | 0.574                     |                     | % Cult. Land | 0.003  | 0.17    | 0.867   |
|                         |                      | Rice %       | -0.07  | -4.38   | < 0.001       |                         | Rice %       | -0.07  | -3.93   | < 0.001                   |                     | Rice %       | -0.07  | -3.79   | < 0.001 |
|                         | Certainty            | Female       | 0.09   | 45.01   | < 0.001       | In/Outgroup: Connecting | Female       | 0.0002 | 0.12    | 0.907                     | Fashion and Trends  | Female       | 0.04   | 15.57   | < 0.001 |
|                         |                      | Path. Prev.  | -0.005 | -0.53   | 0.602         |                         | Path. Prev.  | 0.005  | 0.63    | 0.534                     |                     | Path. Prev.  | 0.004  | 0.53    | 0.602   |
|                         |                      | % Urban      | -0.03  | -2.46   | 0.023         |                         | % Urban      | -0.04  | -3.10   | 0.006                     |                     | % Urban      | 0.01   | 1.07    | 0.295   |
|                         |                      | % Herding    | 0.01   | 0.97    | 0.342         |                         | % Herding    | 0.02   | 3.00    | 0.006                     |                     | % Herding    | 0.005  | 0.75    | 0.458   |
|                         |                      | % Cult. Land | -0.02  | -1.44   | 0.164         |                         | % Cult. Land | -0.02  | -1.56   | 0.136                     |                     | % Cult. Land | 0.01   | 0.60    | 0.554   |
|                         |                      | Rice %       | -0.06  | -4.60   | < 0.001       |                         | Rice %       | -0.02  | -2.15   | 0.045                     |                     | Rice %       | 0.01   | 0.64    | 0.526   |
|                         | Possibility/Openness | Female       | 0.08   | 37.82   | < 0.001       | In/Outgroup: Dividing   | Female       | -0.01  | -2.93   | 0.003                     | Affect              | Female       | 0.26   | 137.08  | < 0.001 |
|                         |                      | Path. Prev.  | -0.01  | -0.61   | 0.545         |                         | Path. Prev.  | 0.004  | 0.25    | 0.803                     |                     | Path. Prev.  | 0.02   | 1.68    | 0.105   |
|                         |                      | % Urban      | -0.03  | -1.85   | 0.079         |                         | % Urban      | 0.03   | 1.23    | 0.235                     |                     | % Urban      | -0.05  | -3.06   | 0.006   |
|                         |                      | % Herding    | 0.003  | 0.43    | 0.674         |                         | % Herding    | -0.01  | -0.53   | 0.598                     |                     | % Herding    | 0.02   | 1.91    | 0.067   |
|                         |                      | % Cult. Land | -0.01  | -1.00   | 0.331         |                         | % Cult. Land | -0.01  | -0.46   | 0.654                     |                     | % Cult. Land | -0.02  | -1.74   | 0.095   |
|                         |                      | Rice %       | -0.04  | -3.18   | 0.004         |                         | Rice %       | 0.01   | 0.40    | 0.691                     |                     | Rice %       | -0.01  | -1.02   | 0.320   |
| Assent                  | Female               | 0.18         | 93.52  | < 0.001 | Self          | Female                  | -0.05        | -17.61 | < 0.001 | Cog. & Dis. Non-Fluencies | Female              | 0.18         | 90.23  | < 0.001 |         |
|                         | Path. Prev.          | 0.01         | 0.98   | 0.338   |               | Path. Prev.             | -0.002       | -0.17  | 0.866   |                           | Path. Prev.         | -0.003       | -0.29  | 0.774   |         |
|                         | % Urban              | -0.01        | -0.49  | 0.629   |               | % Urban                 | 0.01         | 1.00   | 0.327   |                           | % Urban             | -0.02        | -0.93  | 0.361   |         |
|                         | % Herding            | -0.01        | -0.85  | 0.406   |               | % Herding               | -0.01        | -1.07  | 0.291   |                           | % Herding           | -0.005       | -0.50  | 0.618   |         |
|                         | % Cult. Land         | -0.01        | -0.38  | 0.705   |               | % Cult. Land            | -0.02        | -1.38  | 0.184   |                           | % Cult. Land        | -0.01        | -0.45  | 0.660   |         |
|                         | Rice %               | 0.08         | 4.41   | < 0.001 |               | Rice %                  | -0.01        | -1.05  | 0.304   |                           | Rice %              | 0.06         | 3.61   | 0.002   |         |

Note: Pathogen prevalence statistics measure rates of human-transmitted infectious diseases based on a study in 1976 (Chen, Campbell, Li, & Peto, 1990) that we supplemented with data from more recent Statistical Yearbooks to increase the sample of provinces. Analyses are hierarchical linear models nested in provinces.

**Table S19***Rice-Wheat Border Differences for All Word Categories in Table 3*

| Word Category           | Rice Side<br>Words per 10,000 | Wheat Side<br>Words per 10,000 | <i>t</i> | <i>P</i> | 95% <i>CI</i> |        |
|-------------------------|-------------------------------|--------------------------------|----------|----------|---------------|--------|
| Cognitive Processes     | 861.12                        | 871.21                         | 2.91     | 0.004    | [3.29         | 16.89] |
| Causation               | 87.50                         | 89.19                          | 2.84     | 0.005    | [0.52         | 2.86]  |
| Certainty               | 120.94                        | 122.36                         | 2.10     | 0.036    | [0.09         | 2.75]  |
| Possibility/Openness    | 132.45                        | 134.58                         | 2.61     | 0.009    | [0.53         | 3.72]  |
| Assent                  | 460.57                        | 446.12                         | -5.58    | < 0.001  | [-19.53       | -9.38] |
| Non-Fluencies           | 54.80                         | 53.15                          | -2.94    | 0.003    | [-2.76        | -0.55] |
| Universalism            | 15.21                         | 15.24                          | 0.13     | 0.897    | [-0.38        | 0.44]  |
| Humans                  | 96.90                         | 101.32                         | 5.34     | < 0.001  | [2.80         | 6.04]  |
| In/Outgroup: Connecting | 19.45                         | 19.89                          | 1.78     | 0.074    | [-0.04        | 0.91]  |
| In/Outgroup: Dividing   | 3.47                          | 3.43                           | -0.34    | 0.735    | [-0.30        | 0.21]  |
| I                       | 127.90                        | 130.77                         | 2.51     | 0.012    | [0.63         | 5.12]  |
| Self                    | 6.66                          | 6.40                           | -2.32    | 0.020    | [-0.47        | -0.04] |
| Positivity/Optimism     | 20.48                         | 22.28                          | 5.67     | < 0.001  | [1.18         | 2.42]  |
| Achievement             | 112.96                        | 117.24                         | 4.86     | < 0.001  | [2.56         | 6.01]  |
| Fashion and Trends      | 10.79                         | 10.42                          | -1.95    | 0.051    | [-0.73        | 0.00]  |
| Affect                  | 710.86                        | 713.00                         | 0.74     | 0.462    | [-3.55        | 7.83]  |
| We                      | 23.36                         | 23.85                          | 1.77     | 0.077    | [-0.05        | 1.02]  |

Note: This table presents rice-wheat border tests for all word categories in Table 4. The rice-wheat border analysis in the main text focuses on the word categories that were significant for China as a whole. The border runs through Sichuan, Chongqing, Hubei, Jiangsu, and Anhui. Prefectures in these provinces are defined as rice if they devote more than 50% of cultivated land to paddies. These nearby prefectures differ sharply in rice (Talhelm and Oishi 2018) but very little in temperature, latitude, distance from contact with herding cultures, and other potential confounds.

**Table S20***Convergent Validity Tests with Provincial/Prefecture Collectivism Indexes, Norm Tightness, Holistic Thought, and Self-Inflation*

| Word Category          | Markers That Are Higher in Collectivistic Cultures |          |                          |          |                |          |                  |          | Lower          |          |       |
|------------------------|----------------------------------------------------|----------|--------------------------|----------|----------------|----------|------------------|----------|----------------|----------|-------|
|                        | Province Collectivism                              |          | Pref. Collectivism Index |          | Norm Tightness |          | Holistic Thought |          | Self-Inflation |          |       |
|                        | <i>r</i>                                           | <i>p</i> | <i>r</i>                 | <i>p</i> | <i>r</i>       | <i>p</i> | <i>r</i>         | <i>p</i> | <i>r</i>       | <i>p</i> |       |
| <b>Individualistic</b> | Self                                               | -0.04    | 0.836                    | -0.18    | 0.201          | 0.10     | 0.592            | -0.24    | 0.200          | 0.33     | 0.083 |
|                        | I                                                  | 0.12     | 0.512                    | -0.09    | 0.557          | -0.67    | < 0.001          | -0.21    | 0.257          | 0.04     | 0.825 |
|                        | I/(I + We)                                         | 0.28     | .126                     | 0.11     | 0.437          | -0.11    | 0.550            | 0.21     | 0.271          | -0.16    | 0.432 |
|                        | I (Controlling for General Pronoun Use)            | 0.38     | 0.039                    | 0.11     | 0.456          | -0.35    | 0.061            | 0.14     | 0.461          | -0.10    | 0.636 |
| <b>Collectivistic</b>  | We                                                 | -0.28    | 0.122                    | -0.20    | 0.174          | -0.60    | < 0.001          | -0.45    | 0.013          | 0.24     | 0.228 |
|                        | Fashion/Trends                                     | -0.23    | 0.204                    | 0.14     | 0.321          | 0.31     | 0.088            | -0.21    | 0.266          | 0.14     | 0.476 |

Note: Green shaded rows correlate in the theoretically consistent direction. Red shaded rows correlate in the inconsistent direction. The province and prefectural collectivism indexes are Z scores of (% 3-generation households - % living alone - % nuclear families – divorce to marriage ratio) based on prior indexes in the US and China (Vandello and Cohen 1999; Gong et al. 2021). The tightness of social norms comes from a survey of 11,662 people from 31 provinces. Holistic thought comes from tests using the triad categorization task with 1,019 students from 30 provinces. Self-inflation data comes from 515 college students from 28 provinces who completed the sociogram task. In the sociogram task, participants draw circles to represent the self and their friends. People in individualistic cultures draw the self much larger than friends on average, whereas people in collectivistic cultures show less self-inflation

**Table S21A***Discriminant Validity: Newly Created Word Categories (Top) Correlations with LIWC (Left)*

| LIWC Word Categories           | Newly Created Word Categories |                         |                       |       |                     |                |
|--------------------------------|-------------------------------|-------------------------|-----------------------|-------|---------------------|----------------|
|                                | Universalism                  | In/Outgroup: Connecting | In/Outgroup: Dividing | Self  | Positivity/Optimism | Fashion/Trends |
| Achieve                        | 0.16                          | 0.04                    | 0.07                  | 0.21  | 0.52                | 0.05           |
| Adverb                         | 0.02                          | -0.02                   | 0.01                  | 0.08  | 0.28                | -0.13          |
| Affect                         | 0.00                          | -0.05                   | -0.06                 | 0.02  | 0.19                | -0.07          |
| Affiliation                    | 0.09                          | 0.01                    | -0.02                 | 0.01  | 0.13                | 0.08           |
| Anger                          | 0.08                          | 0.05                    | 0.03                  | 0.07  | 0.08                | -0.11          |
| Anxiety                        | 0.04                          | -0.01                   | 0.00                  | 0.03  | 0.13                | -0.07          |
| Assent                         | -0.09                         | -0.05                   | -0.03                 | -0.06 | -0.08               | -0.08          |
| Auxiliary Verbs                | 0.09                          | -0.02                   | 0.01                  | 0.13  | 0.41                | -0.10          |
| Biological Processes           | -0.06                         | -0.06                   | -0.05                 | -0.04 | 0.09                | -0.01          |
| Body                           | -0.09                         | -0.05                   | -0.05                 | -0.07 | -0.01               | 0.01           |
| Cause                          | 0.13                          | 0.03                    | 0.08                  | 0.16  | 0.27                | -0.07          |
| Certainty                      | 0.10                          | 0.01                    | 0.02                  | 0.14  | 0.35                | -0.05          |
| Cognitive Processes            | 0.10                          | -0.01                   | 0.04                  | 0.17  | 0.42                | -0.13          |
| Comparisons                    | 0.09                          | 0.00                    | 0.03                  | 0.12  | 0.28                | -0.04          |
| Conjunctions                   | 0.11                          | 0.02                    | 0.04                  | 0.17  | 0.37                | -0.11          |
| Death                          | 0.03                          | 0.07                    | 0.01                  | -0.01 | -0.07               | -0.10          |
| Differences                    | 0.08                          | 0.01                    | 0.03                  | 0.15  | 0.36                | -0.14          |
| Discrepancy                    | 0.08                          | -0.02                   | 0.00                  | 0.13  | 0.42                | -0.10          |
| Drives                         | 0.16                          | 0.06                    | 0.06                  | 0.14  | 0.35                | 0.02           |
| Family                         | -0.06                         | 0.00                    | 0.00                  | -0.01 | -0.01               | -0.04          |
| Feel                           | -0.06                         | -0.04                   | -0.02                 | -0.02 | 0.04                | 0.00           |
| Female                         | -0.03                         | -0.01                   | 0.01                  | -0.02 | 0.00                | 0.02           |
| Focus Future                   | 0.02                          | 0.01                    | 0.02                  | 0.02  | 0.07                | -0.05          |
| Focus Past                     | -0.01                         | 0.03                    | 0.02                  | 0.02  | 0.05                | -0.11          |
| Focus Present                  | 0.00                          | 0.06                    | 0.02                  | 0.03  | 0.08                | -0.05          |
| Friends                        | -0.02                         | 0.10                    | 0.01                  | -0.01 | 0.00                | 0.01           |
| Function Words                 | 0.03                          | -0.03                   | 0.00                  | 0.08  | 0.29                | -0.16          |
| General Particles <sup>1</sup> | 0.09                          | 0.00                    | 0.02                  | 0.11  | 0.25                | -0.11          |
| Health                         | 0.04                          | 0.00                    | -0.01                 | 0.07  | 0.25                | -0.06          |
| Hear                           | -0.03                         | -0.01                   | -0.02                 | -0.03 | -0.04               | -0.03          |
| Home                           | -0.06                         | 0.00                    | 0.01                  | -0.04 | -0.12               | 0.02           |
| Humans                         | 0.13                          | 0.02                    | 0.02                  | 0.18  | 0.38                | -0.07          |
| I                              | -0.09                         | -0.05                   | -0.04                 | -0.01 | 0.09                | -0.11          |
| Informal                       | -0.16                         | -0.09                   | -0.05                 | -0.12 | -0.18               | -0.10          |
| Ingestion                      | -0.09                         | -0.04                   | -0.03                 | -0.06 | -0.06               | -0.02          |
| Insight                        | 0.01                          | -0.02                   | 0.03                  | 0.07  | 0.19                | -0.13          |
| Interrogatives                 | 0.04                          | 0.01                    | 0.03                  | 0.04  | 0.11                | -0.06          |
| Impersonal Pronouns            | 0.14                          | 0.01                    | 0.02                  | 0.14  | 0.35                | -0.13          |
| Leisure                        | 0.02                          | -0.01                   | -0.03                 | 0.00  | 0.01                | 0.13           |
| Male                           | -0.01                         | -0.01                   | 0.01                  | 0.00  | -0.01               | -0.05          |
| Modal Particles                | -0.17                         | -0.07                   | -0.06                 | -0.15 | -0.26               | -0.07          |

Note: Highlighting:  $r \geq 0.20$ ,  $r \geq 0.30$ ,  $r \geq 0.40$ ,  $r \geq 0.50$ . Some researchers have suggested using correlations above 0.90 as clear signs of redundancy, 0.80 as a warning sign, and below 0.80 as acceptable (Rönkkö and Cho 2022). The in-group/out-group connecting category does not include "we." <sup>1</sup>General particles are grammatical function words, such as the possessive marker 的, which functions like the 's in "John's."

**Table S21B***Discriminant Validity: Newly Created Word Categories (Top) Correlations with LIWC (Left)*

| LIWC Word Categories                       | Newly Created Word Categories |                            |                          |       |                         |                    |
|--------------------------------------------|-------------------------------|----------------------------|--------------------------|-------|-------------------------|--------------------|
|                                            | Universalism                  | In/Outgroup:<br>Connecting | In/Outgroup:<br>Dividing | Self  | Positivity/<br>Optimism | Fashion/<br>Trends |
| Money                                      | 0.02                          | 0.03                       | 0.09                     | 0.07  | 0.03                    | 0.07               |
| Motion                                     | 0.02                          | 0.01                       | 0.02                     | 0.05  | 0.14                    | -0.04              |
| Negations                                  | 0.08                          | 0.00                       | 0.02                     | 0.13  | 0.36                    | -0.14              |
| Netspeak                                   | -0.11                         | -0.04                      | -0.04                    | -0.10 | -0.21                   | 0.08               |
| Non-Fluencies                              | -0.11                         | -0.05                      | -0.04                    | -0.07 | -0.10                   | -0.09              |
| Numbers                                    | -0.05                         | -0.02                      | -0.01                    | -0.03 | -0.04                   | -0.08              |
| Particles                                  | -0.06                         | -0.06                      | -0.03                    | -0.04 | -0.03                   | -0.11              |
| Perceptual Processes                       | -0.07                         | -0.05                      | -0.05                    | -0.06 | -0.05                   | 0.04               |
| Positive Emotion                           | -0.06                         | -0.08                      | -0.08                    | -0.06 | 0.03                    | 0.02               |
| Power                                      | 0.11                          | 0.09                       | 0.09                     | 0.14  | 0.12                    | -0.03              |
| Personal Pronouns                          | -0.01                         | -0.04                      | -0.04                    | 0.01  | 0.23                    | -0.09              |
| Prepositions                               | 0.14                          | 0.07                       | 0.08                     | 0.18  | 0.27                    | -0.10              |
| Postposition <sup>1</sup>                  | 0.01                          | 0.02                       | 0.03                     | 0.02  | 0.01                    | -0.04              |
| Progressive Markers <sup>2</sup>           | -0.10                         | -0.03                      | 0.00                     | -0.07 | -0.13                   | -0.12              |
| Pronouns                                   | 0.05                          | -0.03                      | -0.02                    | 0.06  | 0.30                    | -0.11              |
| Quantifiers                                | 0.05                          | -0.02                      | 0.01                     | 0.07  | 0.18                    | -0.03              |
| Measure Words <sup>3</sup>                 | -0.04                         | 0.02                       | 0.02                     | 0.00  | -0.06                   | -0.02              |
| Relativity                                 | 0.08                          | 0.06                       | 0.06                     | 0.08  | 0.18                    | -0.08              |
| Religion                                   | 0.12                          | 0.03                       | -0.01                    | 0.05  | 0.09                    | -0.05              |
| Reward                                     | -0.03                         | -0.04                      | -0.04                    | 0.00  | 0.17                    | 0.01               |
| Risk                                       | 0.12                          | 0.06                       | 0.06                     | 0.16  | 0.31                    | -0.11              |
| Sad                                        | 0.07                          | 0.01                       | -0.02                    | 0.07  | 0.29                    | -0.10              |
| See                                        | 0.01                          | -0.01                      | -0.02                    | -0.03 | -0.07                   | 0.10               |
| Sexual                                     | -0.02                         | -0.05                      | -0.05                    | -0.04 | 0.05                    | 0.06               |
| She/He                                     | 0.02                          | 0.00                       | 0.01                     | 0.03  | 0.05                    | -0.05              |
| Social                                     | 0.08                          | 0.01                       | 0.02                     | 0.10  | 0.29                    | -0.06              |
| Space                                      | 0.18                          | 0.06                       | 0.09                     | 0.08  | 0.10                    | -0.05              |
| Specific Article <sup>4</sup>              | 0.05                          | 0.02                       | 0.03                     | 0.02  | 0.02                    | -0.04              |
| Swear Words                                | -0.05                         | -0.01                      | 0.01                     | -0.04 | -0.10                   | -0.07              |
| Tense Marker <sup>5</sup>                  | -0.06                         | 0.00                       | 0.02                     | -0.03 | -0.01                   | -0.14              |
| Possibility/Openness (Tentat) <sup>6</sup> | 0.05                          | -0.01                      | 0.02                     | 0.10  | 0.26                    | -0.06              |
| They                                       | 0.07                          | 0.06                       | 0.03                     | 0.07  | 0.06                    | -0.04              |
| Time                                       | -0.02                         | 0.04                       | 0.02                     | 0.03  | 0.16                    | -0.07              |
| Work                                       | 0.12                          | 0.10                       | 0.12                     | 0.15  | 0.18                    | 0.00               |
| We                                         | 0.07                          | 0.04                       | -0.01                    | 0.05  | 0.16                    | -0.01              |
| You                                        | 0.05                          | -0.04                      | -0.04                    | 0.00  | 0.27                    | -0.03              |
| You Plural <sup>7</sup>                    | -0.06                         | 0.00                       | 0.00                     | -0.06 | -0.08                   | -0.02              |

Note: Highlighting:  $r \geq 0.20$ ,  $r \geq 0.30$ ,  $r \geq 0.40$ ,  $r \geq 0.50$ ,  $r \leq -0.20$ . The in-group/out-group connecting category does not include "we." <sup>1</sup>Postposition: Grammatical word that comes after the word it modifies, such as 的 to mark possession. <sup>2</sup>Progressive markers communicate progressive tense, such as 了. <sup>3</sup>Measure words count objects, such as "bowl" in "one bowl of soup" (一碗汤). <sup>4</sup>Specific articles denote a specific object/actor, such as 各 (each) and 某 ([a] certain [person/thing]). <sup>5</sup>Tense markers mark time, such as "recently" (近日). <sup>6</sup>We title the LIWC category of "tentative" as "possibility/openness." <sup>7</sup>You plural: Second person plural, such as 你们 (similar to "y'all" in English).

**Table S22A***Words in Newly Created Categories: Ingroup-Outgroup and Universalism*

| <b>Ingroup-Outgroup Connecting</b> |                                                      | <b>Universalism</b> |                                                             |
|------------------------------------|------------------------------------------------------|---------------------|-------------------------------------------------------------|
| 熟人                                 | Acquaintance/familiar person                         | 人类                  | Humanity/mankind                                            |
| 同胞                                 | Compatriot                                           | 全球                  | Global/worldwide                                            |
| 同伴                                 | Companion                                            | 博爱                  | Universal fraternity/love                                   |
| 同伙                                 | Partner                                              | 共同                  | Common/shared/mutual                                        |
| 我们                                 | We/us                                                | 公民                  | Citizen                                                     |
| 同行                                 | Colleague/fellow practitioner                        | 人民                  | The people/populace                                         |
| 集体                                 | Collective/group                                     | 公共                  | Public                                                      |
| 故乡                                 | Hometown                                             | 人间                  | Human world/Earth                                           |
| <b>Ingroup-Outgroup Dividing</b>   |                                                      | 世界                  | World                                                       |
| 外地人                                | Outsider (from a diff. Place, not local)             | 宇宙                  | Universe                                                    |
| 外行                                 | Outsider (to a profession/industry)                  | 大众                  | The masses/public                                           |
| 内部                                 | Internal                                             | 公众                  | Public/audience                                             |
| 外部                                 | External                                             | 团结                  | Unity/solidarity                                            |
| 局外人                                | Outsider (someone not a part of a group or activity) | 全民                  | All the people/entire nation                                |
| 外行人                                | Outsider (to a profession/industry)                  | 环球                  | Global/worldwide                                            |
| 外人                                 | Outsider (often refers to non-locals)                | 世间                  | The world/Earth                                             |
| 外地                                 | Another place/elsewhere                              | 世上                  | In the world/on Earth                                       |
| 异地                                 | Different place/elsewhere                            | 天地                  | Heaven and earth (meaning “world” or “everywhere”)/universe |

**Table S22B***Words in Newly Created Categories: Positivity/Optimism*

| <b>Positivity/Optimism</b> |                                                      |    |                                           |
|----------------------------|------------------------------------------------------|----|-------------------------------------------|
| 理想                         | Ideal                                                | 用心 | Attentive/meticulous                      |
| 目标                         | Goal/objective                                       | 改进 | Improve/make better                       |
| 追求                         | Pursue                                               | 改善 | Improve/betterment                        |
| 乐观                         | Optimistic/optimism                                  | 战胜 | Defeat/overcome                           |
| 积极                         | Positive/proactive                                   | 果断 | Decisive/resolute                         |
| 自信                         | Self-confidence                                      | 激励 | Inspire/encourage                         |
| 进步                         | Progress/improvement                                 | 坚决 | Firm/resolute                             |
| 鼓励                         | Encourage/urge                                       | 决心 | Determination/resolve                     |
| 努力                         | Effort/try hard/strive                               | 鼓舞 | Inspire/encourage                         |
| 坚持                         | Persevere                                            | 把握 | Grasp/seize                               |
| 坚定                         | Steadfast/resolute                                   | 完善 | Perfect/improve                           |
| 实现                         | Realize (bring something into being)/fulfill         | 投入 | Dedicate (oneself to an effort)/committed |
| 信心                         | Confidence                                           | 勇敢 | Brave/courageous                          |
| 选择                         | Choose/choice                                        | 勇气 | Courage/bravery                           |
| 坚强                         | Strong/staunch/firm                                  | 梦想 | Dream/aspiration                          |
| 超越                         | Surpass/surmount                                     | 成长 | Grow/growth                               |
| 发愤                         | Make a firm resolution/make determined effort/strive | 抱负 | Ambition/aspiration                       |
| 发奋                         | Work hard/make a firm resolution                     | 雄心 | Ambition/lofty aspiration                 |
| 奋斗                         | Strive/struggle (toward a goal)                      | 成就 | Achievement/accomplishment                |
| 奋发                         | Work hard/make a firm resolution                     | 励志 | Inspiring/motivational                    |
| 坚忍                         | Steadfast (in face of difficulties)                  | 进取 | Keep forging ahead/enterprising           |
| 克服                         | Overcome/conquer                                     | 争气 | Work hard for something/bring credit to   |
| 力争                         | Strive/make all efforts                              | 坚韧 | Tenacious/perseverance                    |
| 勤奋                         | Diligent/industrious                                 | 坚守 | Adhere to/hold fast                       |
| 勤恳                         | Diligent/conscientious                               | 卓越 | Excellence/outstanding                    |
| 勤勉                         | Diligent/assiduous                                   | 前途 | Prospects/future                          |
| 驱策                         | Urge/impetus                                         | 拼搏 | Go all out/strive                         |
| 意志                         | Will/determination                                   | 坚信 | Firmly believe/conviction                 |
| 毅力                         | Willpower/perseverance/tenacity                      | 立志 | Resolve/determination                     |
| 用功                         | Diligent/hardworking                                 |    |                                           |

**Table S22C***Words in Newly Created Categories: Fashion/Trends*

| <b>Fashion/Trends</b> |                                |    |                                  |
|-----------------------|--------------------------------|----|----------------------------------|
| 潮流                    | Trend/tide                     | 时装 | Fashionable dress/latest fashion |
| 热门                    | Popular/hot (as in “in style”) | 名牌 | Famous brand/name brand          |
| 畅销                    | Best-selling/popular           | 人气 | Popularity/fine quality          |
| 达人                    | Connoisseur/enthusiast/guru    | 炒作 | Hype/publicity stunt             |
| 时髦                    | Fashionable/trendy             | 风靡 | Popular/in vogue                 |
| 流行                    | Popular/in fashion             | 女星 | Female star/actress              |
| 名流                    | Celebrities                    | 巨星 | Superstar/mega-star              |
| 名人                    | Celebrity/famous person        | 明星 | Star/celebrity                   |
| 过时                    | Outdated/out of fashion        | 热点 | Hot topic/hotspot                |
| 趋势                    | Trend                          | 热销 | Hot-selling/popular              |
| 新潮                    | New fashion/new trend          | 盛宴 | Grand feast/banquet              |
| 走红                    | Become popular/go viral        | 热卖 | Hot-selling/best-selling         |
| 出名                    | Become famous/well-known       | 时尚 | Fashion/trend                    |
| 天王                    | Top star/emperor               | 高档 | High-end/upscale                 |
| 有名                    | Famous/well-known              | 奢华 | Luxurious/luxury                 |
| 影响力                   | Influence (noun)/impact        | 新款 | New style/new model              |
| 知名                    | Well-known/renowned            | 品牌 | Brand                            |
| 品位                    | Taste (artistic)/style         |    |                                  |

Note: We consulted the dictionary Pleco, ChatGPT, and the authors' knowledge of Chinese to translate these words into English.

## References

- Barry H, Child IL, Bacon MK (1959) Relation of child training to subsistence economy. *Am. Anthropol.* 61(1):51–63
- Chen J, Campbell TC, Li J et al. (1990) *Diet, life-style and mortality in China: A study of the characteristics of 65 Chinese counties*. Oxford University Press, Oxford, UK
- Dong X, Talhelm T, Ren X (2019) Teens in rice county are more interdependent and think more holistically than nearby wheat county. *Soc. Psychol. Personal. Sci.* 10(7):966–976
- Dunning D, Cohen GL (1992) Egocentric definitions of traits and abilities in social judgment. *J. Pers. Soc. Psychol.* 63(3):341–355
- Goldschmidt W (1971) Independence as an element in pastoral social systems. *Anthropol. Q.* 44(3):132–142
- Gong W, Zhu M, Gürel B et al. (2021) The lineage theory of the regional variation of individualism/collectivism in China. *Front. Psychol.*:4047
- Huang C-L, Chung CK, Hui N et al. (2012) The development of the Chinese linguistic inquiry and word count dictionary. *Chin. J. Psychol.* 54(2):185–201
- Inglehart R, Baker WE (2000) Modernization, cultural change, and the persistence of traditional values. *Am. Sociol. Rev.* 65(1):19–51
- Inglehart R, Norris P (2003) *Rising tide: Gender equality and cultural change around the world*. Cambridge University Press, New York, NY
- Kashima Y, Kashima ES (2003) Individualism, GNP, climate, and pronoun drop: is individualism determined by affluence and climate, or does language use play a role? *J. Cross-Cult. Psychol.* 34(1):125–134
- Li X ed. (2017) *China Statistical Yearbook 2001*. National Bureau of Statistics of China, Beijing, China
- Miller JG, Bersoff DM (1992) Culture and moral judgment: how are conflicts between justice and interpersonal responsibilities resolved? *J. Pers. Soc. Psychol.* 58(1):33–47
- Rönkkö M, Cho E (2022) An updated guideline for assessing discriminant validity. *Organ. Res. Methods.* 25(1):6–14
- Talhelm T, Oishi S (2018) How rice farming shaped culture in southern China. In: Uskul, AK, Oishi, S (eds.) *Socioecon. Environ. Hum. Psychol.* Oxford University Press, New York, NY, pp. 53–76
- Talhelm T, Zhang X, Oishi S (2018) Moving chairs in Starbucks: observational studies find rice-wheat cultural differences. *Sci. Adv.* 4:eaap8469. <https://doi.org/10.1126/sciadv.aap8469>
- Talhelm T, Zhang X, Oishi S et al. (2014) Large-scale psychological differences within China explained by rice versus wheat agriculture. *Science.* 344(6184):603–608
- Triandis HC (1995) *Individualism & collectivism*. Westview Press, Boulder, CO
- Uskul AK, Kitayama S, Nisbett RE (2008) Ecocultural basis of cognition: farmers and fishermen are more holistic than herders. *Proc. Natl. Acad. Sci.* 105(25):8552–8556
- Van de Vliert E, Yang H, Wang Y et al. (2012) Climato-economic imprints on Chinese collectivism. *J. Cross-Cult. Psychol.* 44(4):589–605
- Vandello JA, Cohen D (1999) Patterns of individualism and collectivism across the united states. *J. Pers. Soc. Psychol.* 77(2):279–292
